# Supplementary material for: Electron-donable heterojunctions with synergetic Ru-Cu pair sites for biocatalytic microenvironment modulations in inflammatory mandible defects
Source: Springer Nature journal article supplement (doi:10.1038/s41467-024-53824-y), 2024-11-06
Supplement: MOESM1 [file 41467_2024_53824_MOESM1_ESM.pdf]

## Supplementary Information for

Electron-donable heterojunctions with synergetic Ru-Cu pair sites for biocatalytic microenvironment modulations in inflammatory mandible defects

### **This PDF file includes:**

Supplementary Figures 1 to 53

Supplementary Tables 1 to 3

### **Other supporting materials for this manuscript include the following:**

Supplementary Data 1 to 4

## Supplementary Figures

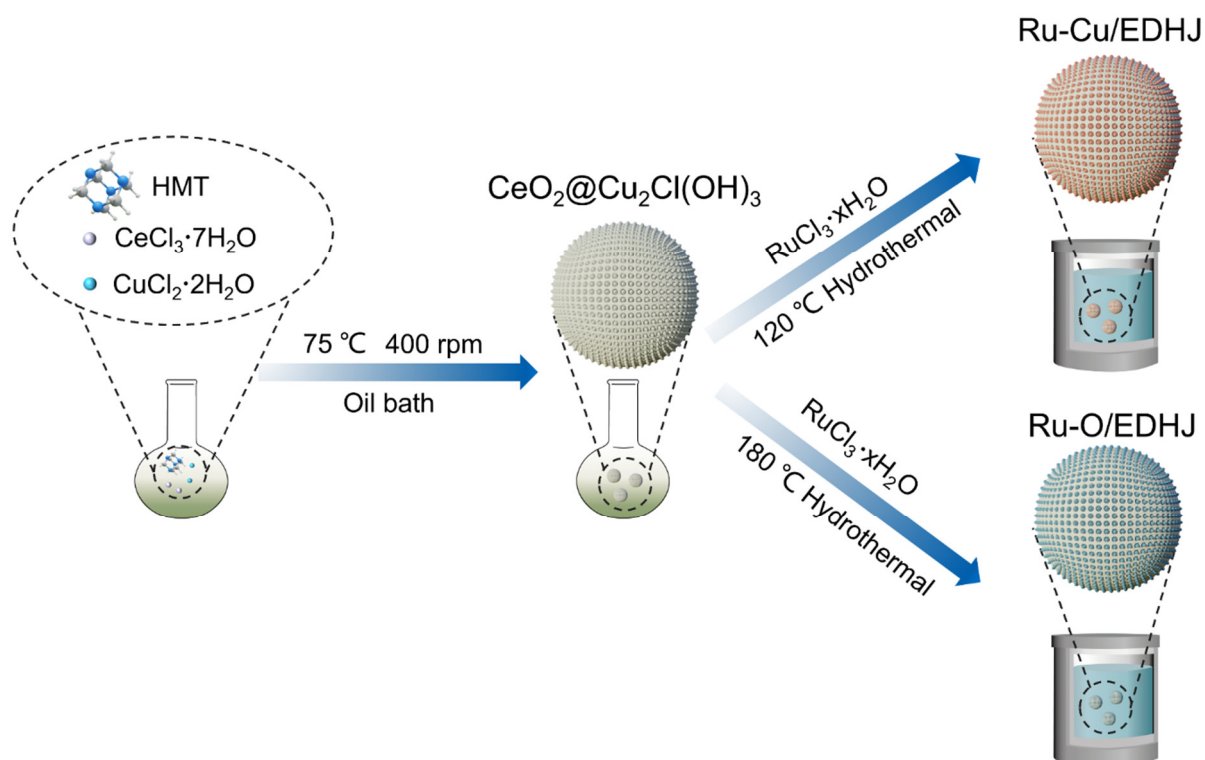

**Supplementary Fig. 1.** Schematic illustration of the synthetic process of  $\text{CeO}_2 @ \text{Cu}_2\text{Cl}(\text{OH})_3$  precursor,  $\text{Ru-Cu/EDHJ}$ , and  $\text{Ru-O/EDHJ}$  biocatalysts. HMT indicates the hexamethylenetetramine. Atomic color coding in the structure of HMT: N, blue; C, gray; H, white.

In our experiment, we started from the  $\text{CeO}_2 @ \text{Cu}_2\text{Cl}(\text{OH})_3$  precursor with abundant exposed surface OH species, which were synthesized by a two-step hydrothermal process as illustrated in Supplementary Fig. 1. We first uniformly dispersed  $\text{Cu}_2\text{Cl}(\text{OH})_3$  nanoclusters on the  $\text{CeO}_2$  support. These  $\text{Cu}_2\text{Cl}(\text{OH})_3$  nanoclusters with surface -OH acts as functional nanoglues to localize metal atoms. Subsequent as-prepared  $\text{CeO}_2 @ \text{Cu}_2\text{Cl}(\text{OH})_3$  is added into a  $\text{RuCl}_3$  solution, and strong electrostatic adsorption deposits Ru atoms on the  $\text{Cu}_2\text{Cl}(\text{OH})_3$ . By judiciously changing the reaction temperature ( $120^\circ\text{C}$  and  $180^\circ\text{C}$ ), the atomically dispersed Ru atoms are deposited on two supports,  $\text{CeO}_2 @ \text{Cu}_2\text{O}$  (EDHJ) and  $\text{CeO}_2 @ \text{CuO}$ , which are named  $\text{Ru-Cu/EDHJ}$  and  $\text{Ru-O/EDHJ}$ , respectively.

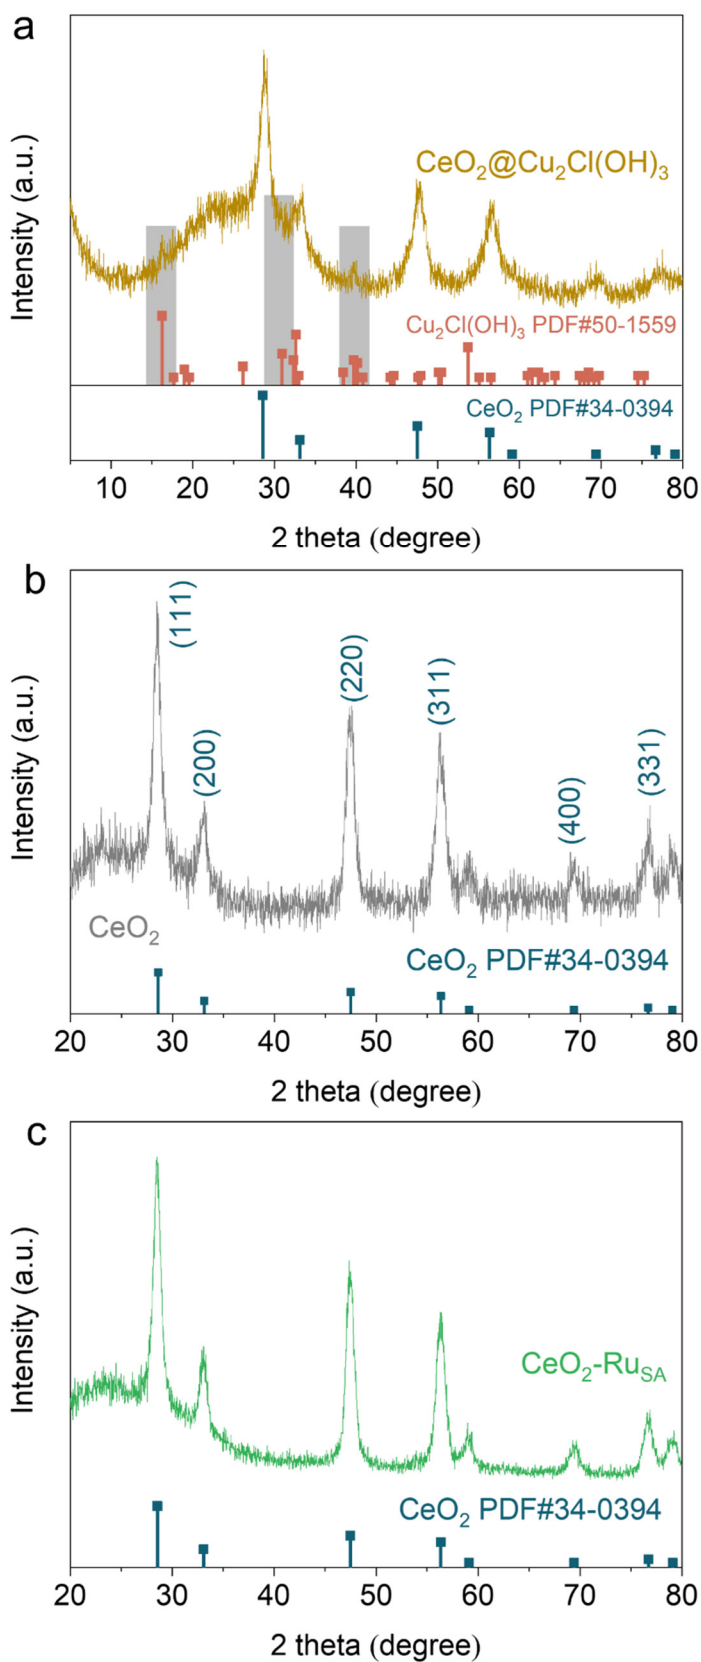

**Supplementary Fig. 2.** X-ray diffraction (XRD) patterns of **a**  $\text{CeO}_2@\text{Cu}_2\text{Cl}(\text{OH})_3$  precursor, **b**  $\text{CeO}_2$ , and **c**  $\text{CeO}_2\text{-Ru}_{\text{SA}}$ . Source data are provided as a Source Data file.

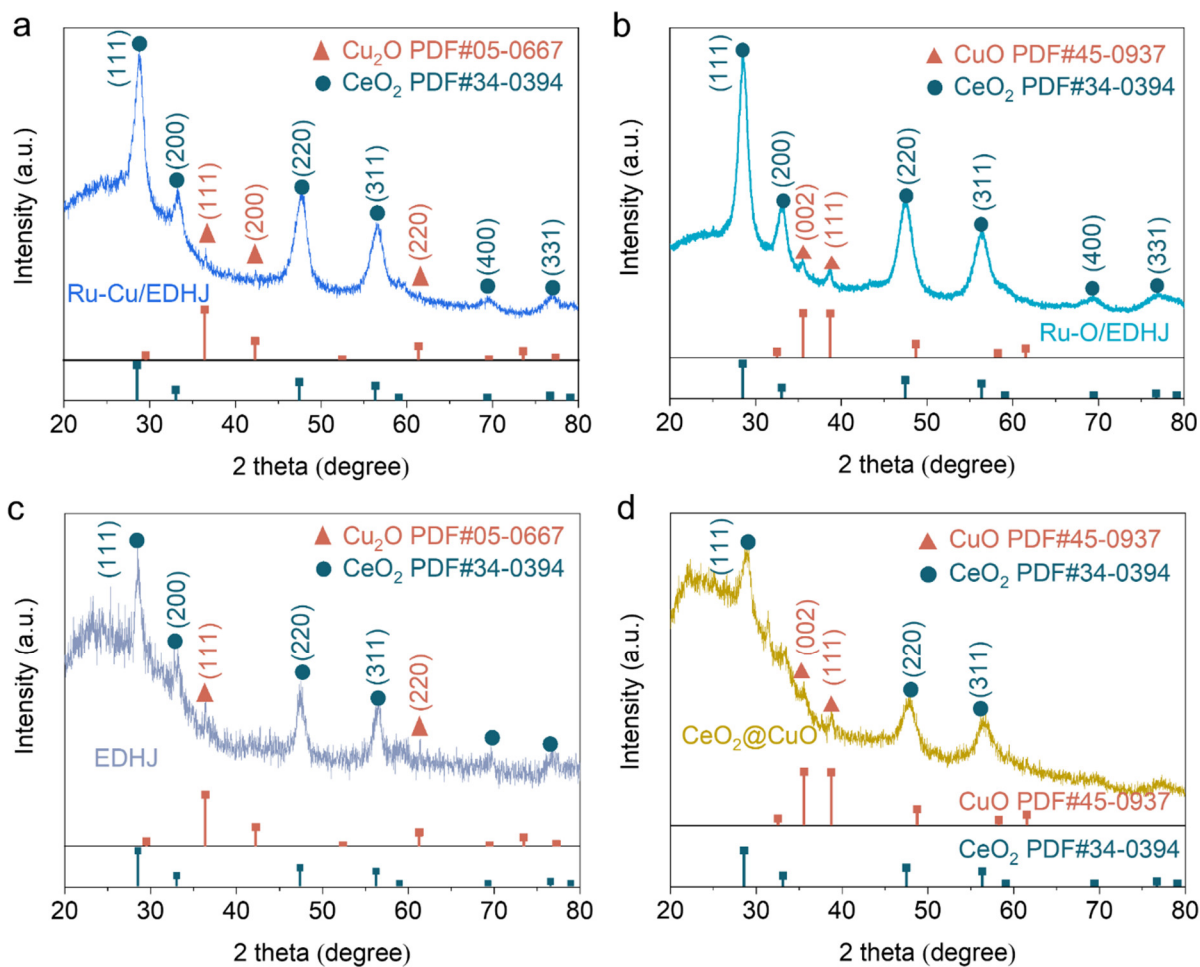

**Supplementary Fig. 3.** XRD patterns of **a** Ru-Cu/EDHJ, **b** Ru-O/EDHJ, **c** EDHJ, and **d**  $\text{CeO}_2$ @CuO.

Source data are provided as a Source Data file.



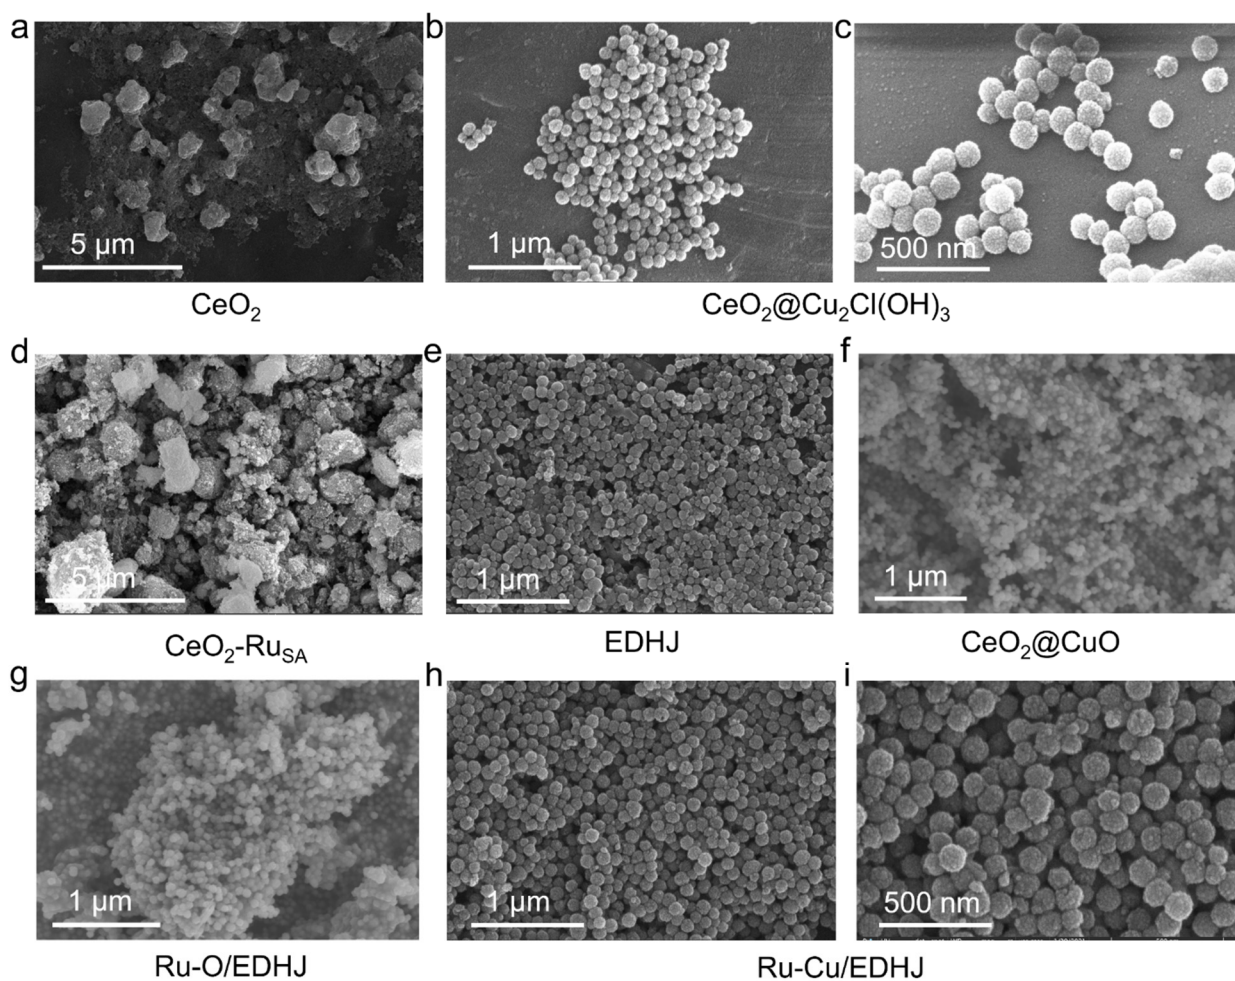

**Supplementary Fig. 4.** Scanning electron microscope (SEM) images of **a**  $\text{CeO}_2$ , **b-c**  $\text{CeO}_2@\text{Cu}_2\text{Cl}(\text{OH})_3$ , **d**  $\text{CeO}_2\text{-Ru}_{\text{SA}}$ , **e** EDHJ, **f**  $\text{CeO}_2@\text{CuO}$ , **g** Ru-O/EDHJ, and **h-i** Ru-Cu/EDHJ.

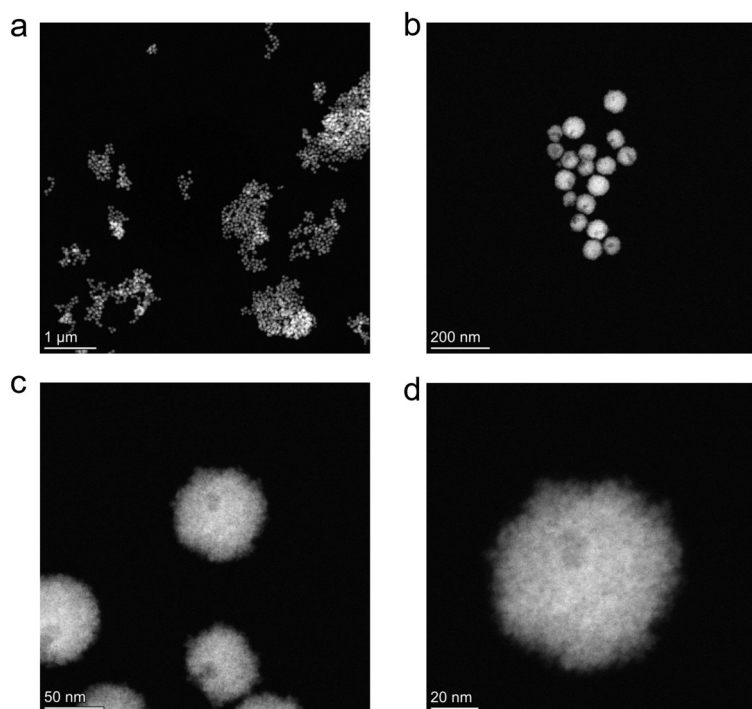

**Supplementary Fig. 5.** High-angle annular dark-field scanning transmission electron microscopy (HAADF-STEM) images of Ru-Cu/EDHJ at varying magnifications: **a** 1  $\mu\text{m}$ , **b** 200 nm, **c** 50 nm, and **d** 20 nm.

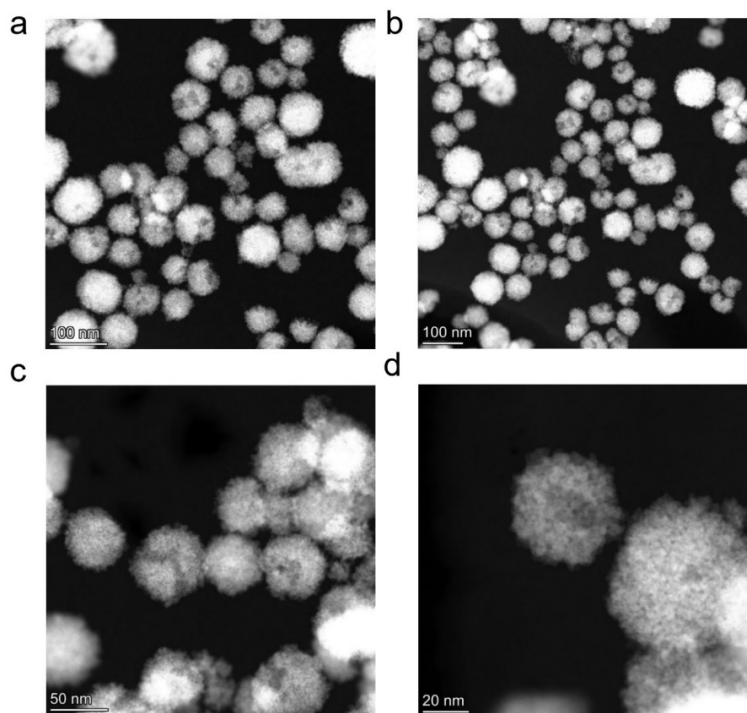

**Supplementary Fig. 6.** HAADF-STEM images of Ru-O/EDHJ at varying magnifications: **a** 100 nm, **b** 100 nm, **c** 50 nm, and **d** 20 nm.



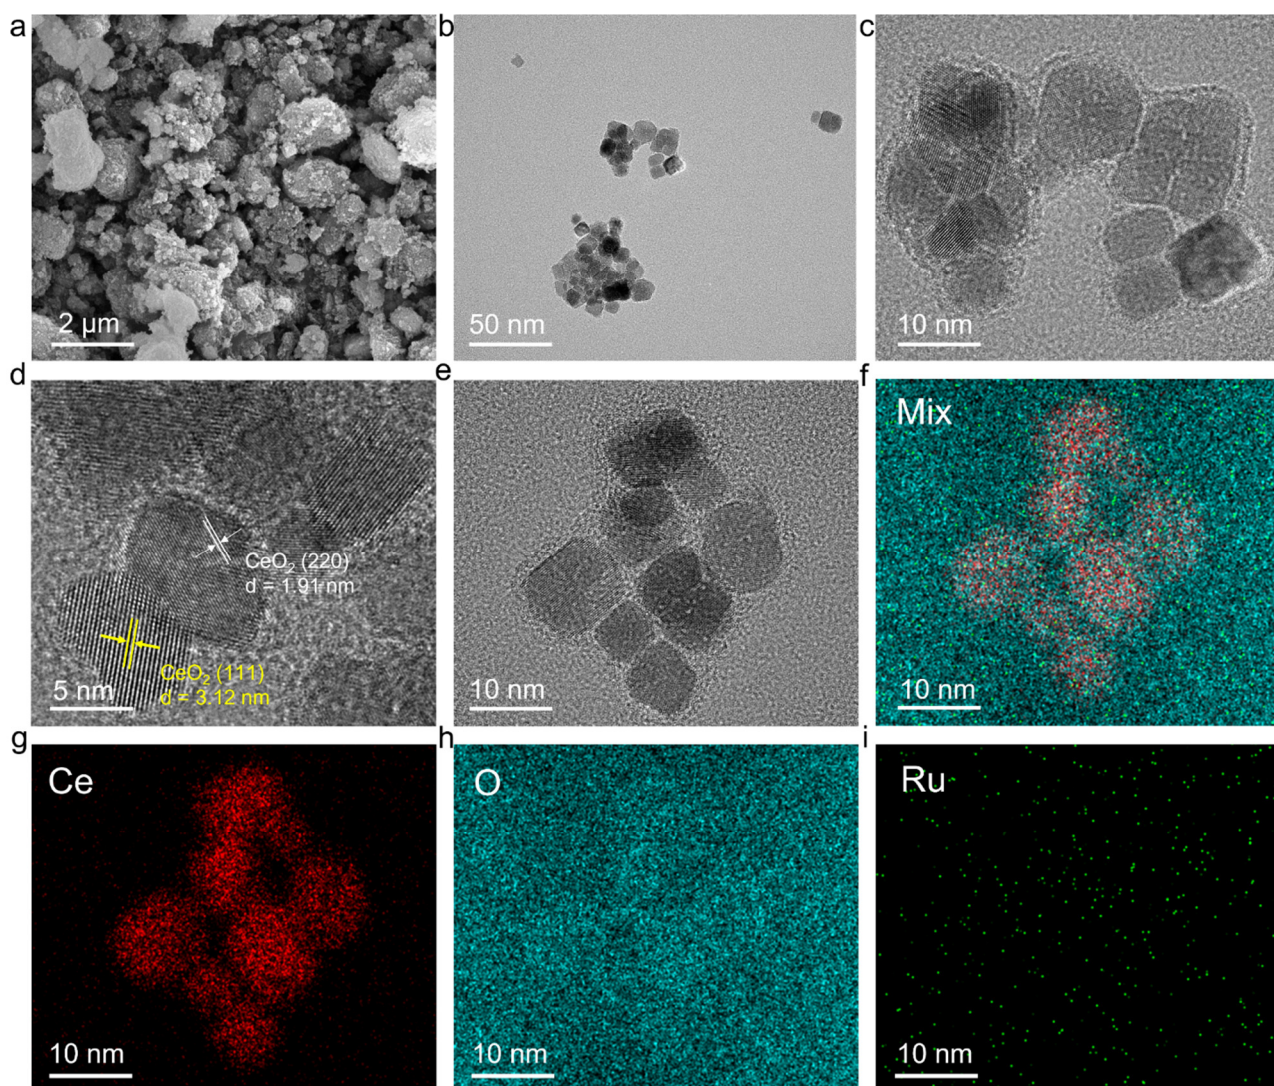

**Supplementary Fig. 7.** **a** SEM image, **b-e** high-resolution TEM images at varying magnifications, and **f-i** corresponding energy-dispersive X-ray spectroscopy (EDS) mapping of  $\text{CeO}_2\text{-Ru}_{\text{SA}}$ .

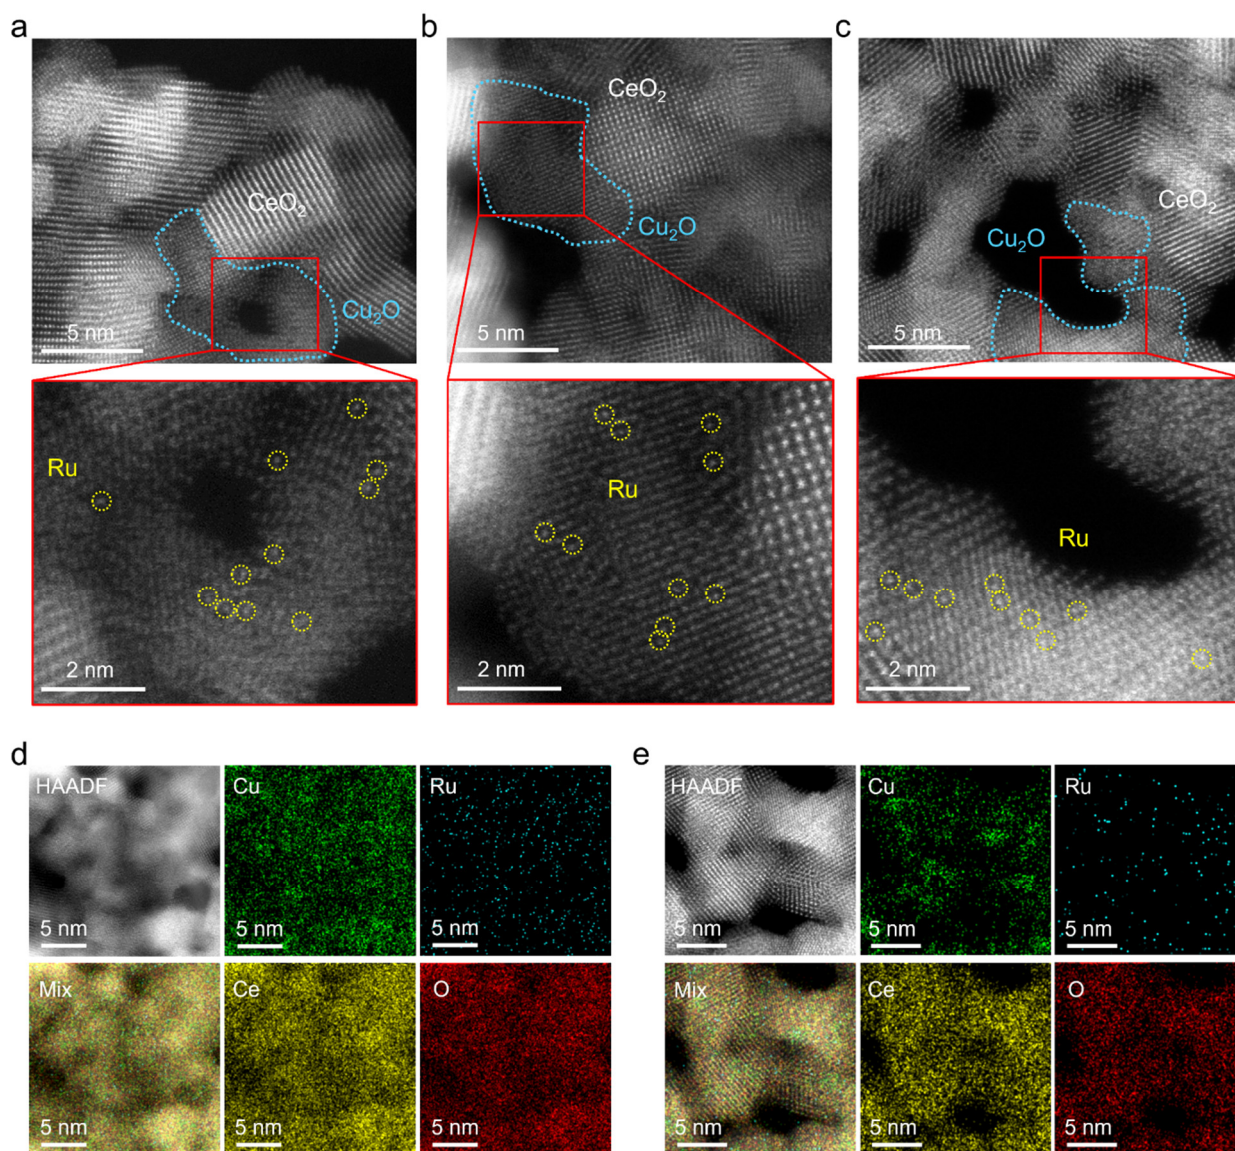

**Supplementary Fig. 8.** **a-c** Atomic-scale HAADF-STEM images and **d-e** EDS mapping of Ru-Cu/EDHJ.



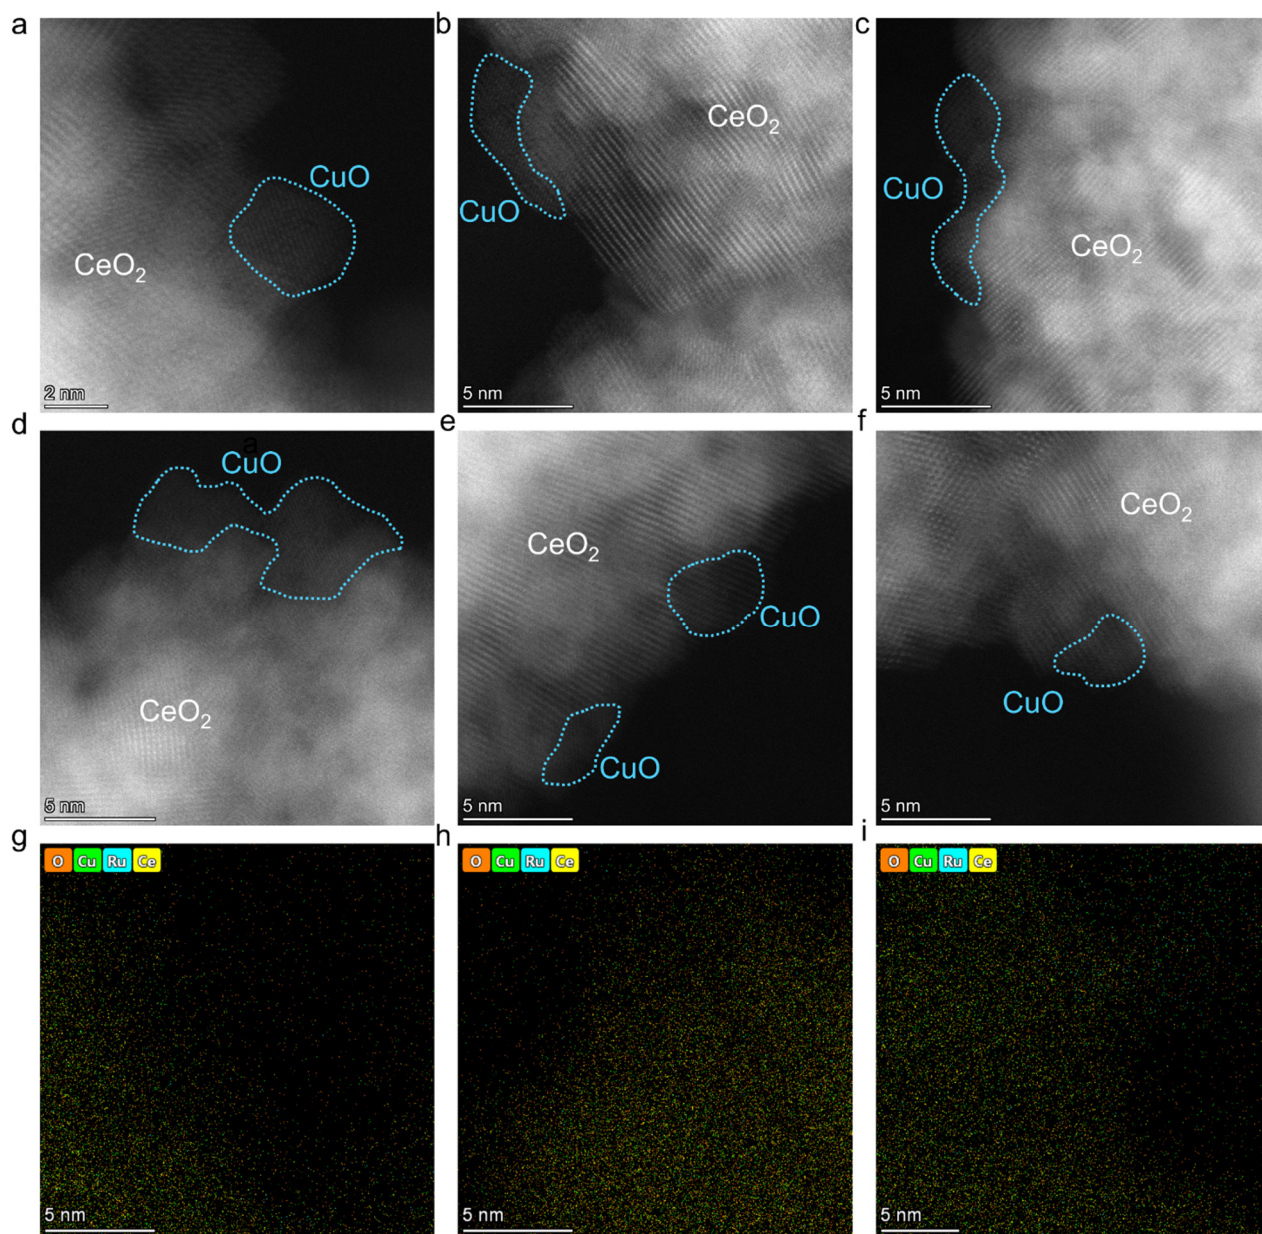

**Supplementary Fig. 9.** a-f Atomic-scale HAADF-STEM images and g-i corresponding EDS mapping of Ru-O/EDHJ.

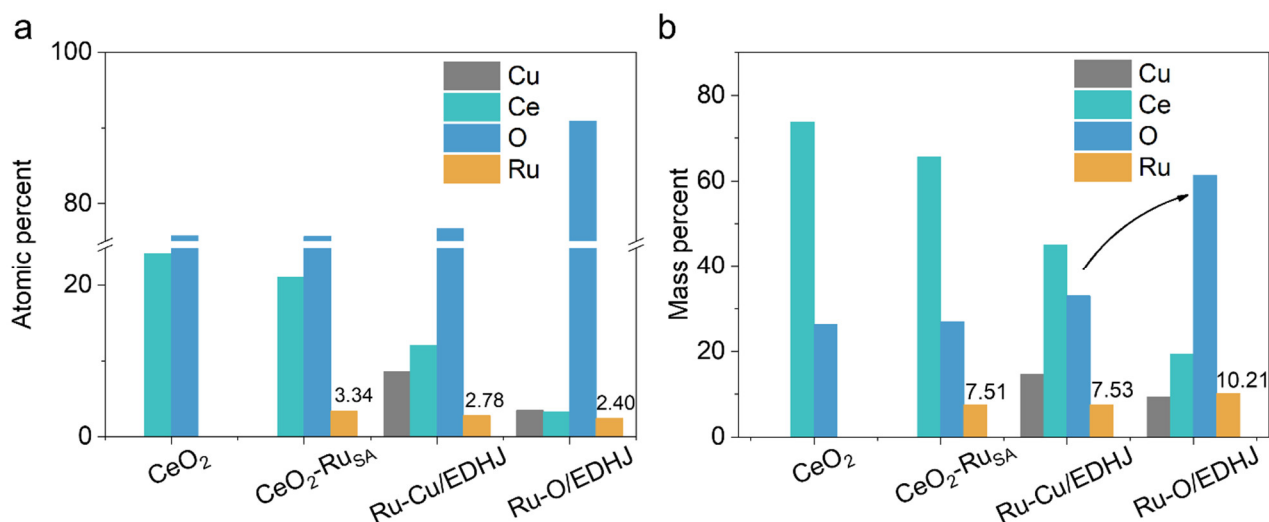

**Supplementary Fig. 10.** Elemental compositions of CeO<sub>2</sub>, CeO<sub>2</sub>-Ru<sub>SA</sub>, Ru-Cu/EDHJ, and Ru-O/EDHJ on X-ray photoelectron spectroscopy (XPS) data, **a** atomic percent and **b** mass percent. Source data are provided as a Source Data file.

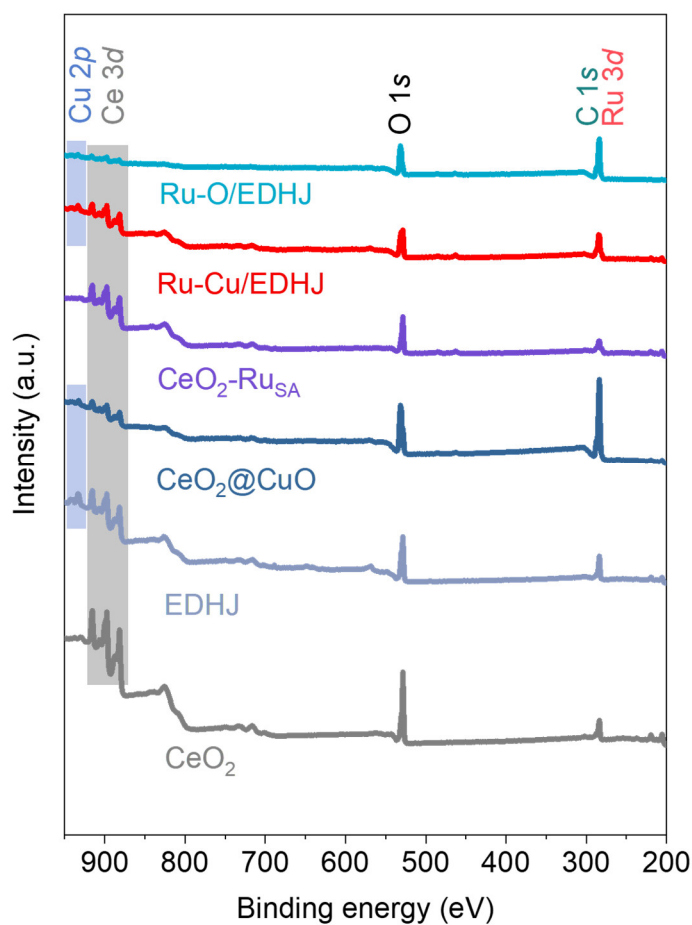

**Supplementary Fig. 11.** XPS survey spectra of CeO<sub>2</sub>, EDHJ, CeO<sub>2</sub>@CuO, CeO<sub>2</sub>-Ru<sub>SA</sub>, Ru-Cu/EDHJ, and Ru-O/EDHJ. Source data are provided as a Source Data file.

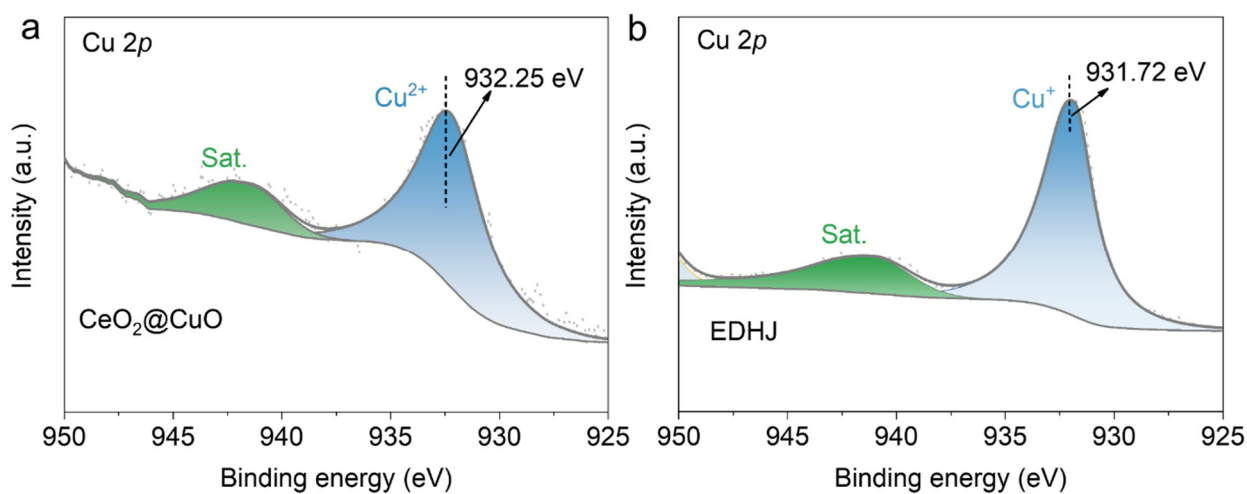

**Supplementary Fig. 12.** Cu 2p XPS spectra of **a**  $\text{CeO}_2@\text{CuO}$  and **b** EDHJ. Sat. indicates the satellite peaks. Source data are provided as a Source Data file.

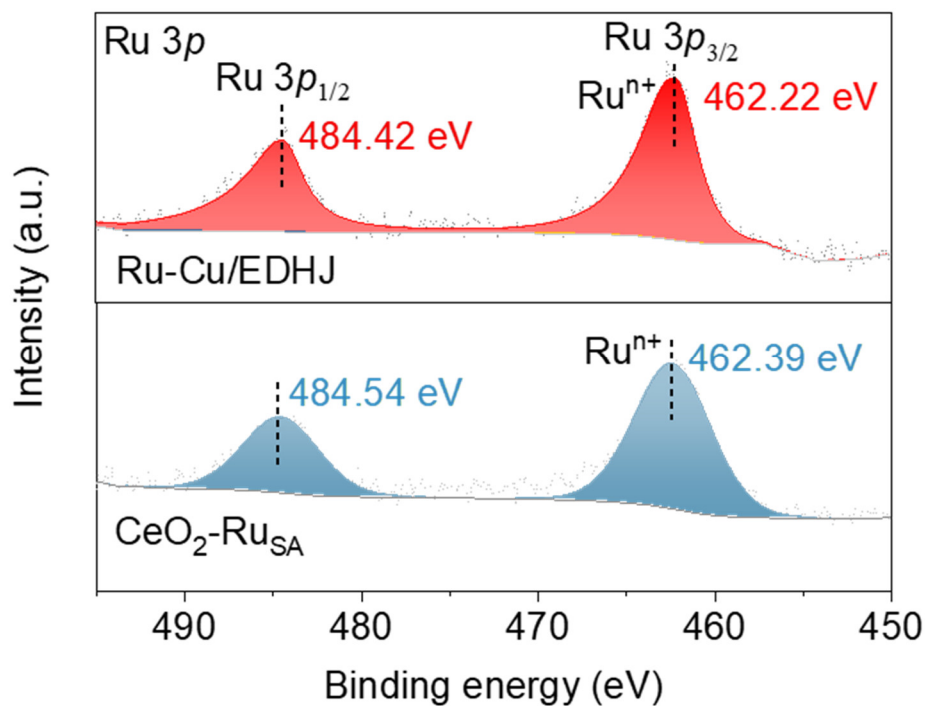

**Supplementary Fig. 13.** Ru 3p XPS spectra of  $\text{CeO}_2\text{-Ru}_{\text{SA}}$  and Ru-Cu/EDHJ. Source data are provided as a Source Data file.

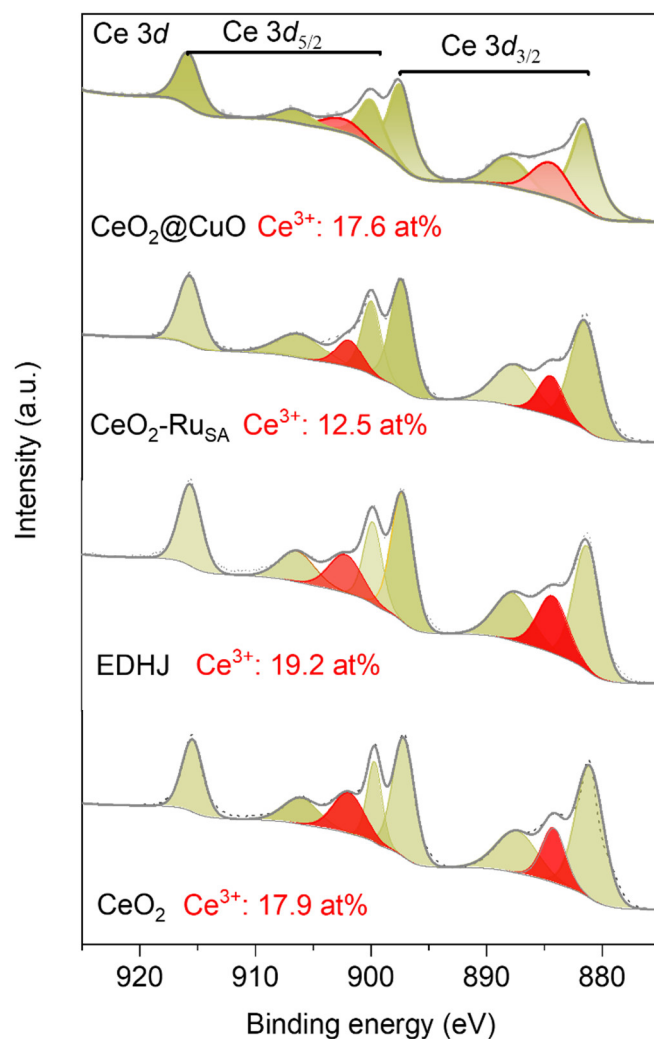

**Supplementary Fig. 14.** Ce 3d XPS spectra of CeO<sub>2</sub>, EDHJ, CeO<sub>2</sub>-Ru<sub>SA</sub>, and CeO<sub>2</sub>@CuO. Source data are provided as a Source Data file.

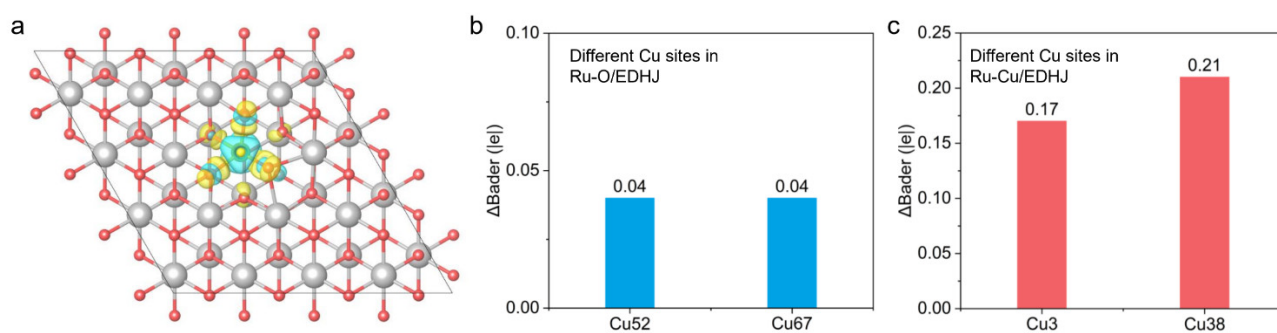

**Supplementary Fig. 15.** **a** Differential charge density analysis of Ru in CeO<sub>2</sub>-Ru<sub>SA</sub> (cyan and yellow represent charge depletion and accumulation, respectively, the cut-off of the density-difference isosurface is 0.006 e·Bohr<sup>-3</sup>). Atomic color coding in the structure: Ru, yellow; Ce, white; O, red. The



relative change values in Bader charge of Cu sites in **b** Ru-O/EDHJ and **c** Ru-Cu/EDHJ before and after Ru doping. Source data are provided as a Source Data file.

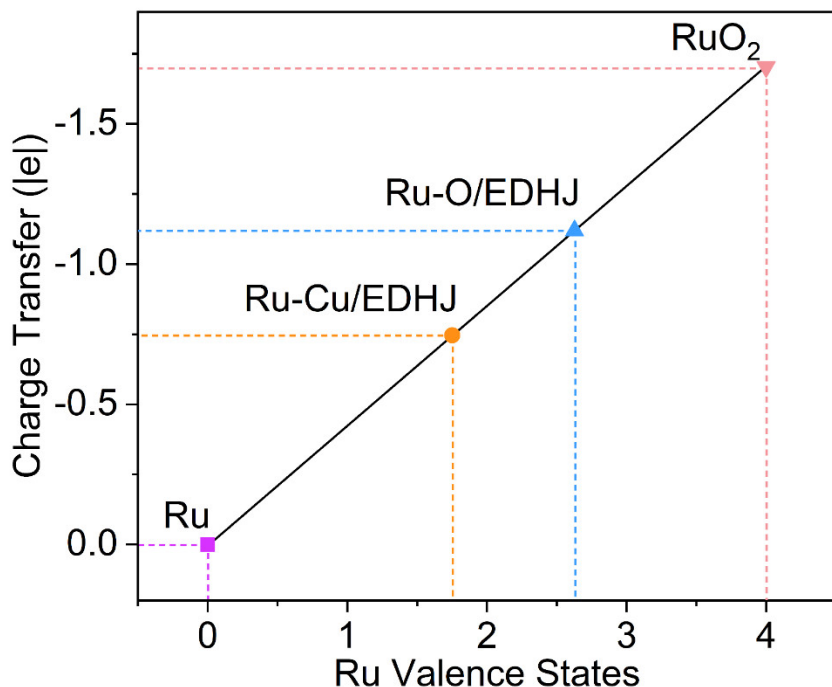

**Supplementary Fig. 16.** Ru valence states analysis of different samples. Source data are provided as a Source Data file.

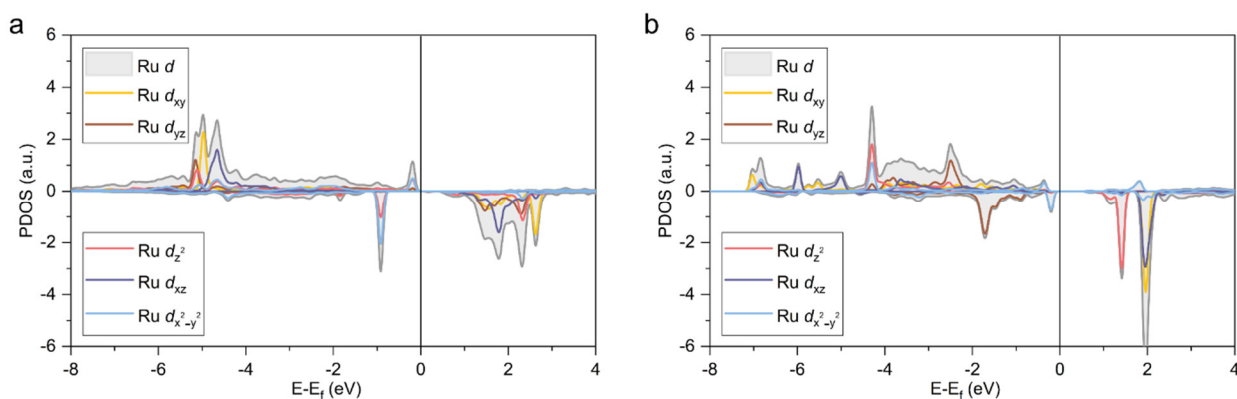

**Supplementary Fig. 17.** Partial density of states (PDOS) analysis of Ru 4d orbital of **a** Ru-O/EDHJ and **b** Ru-Cu/EDHJ. Source data are provided as a Source Data file.

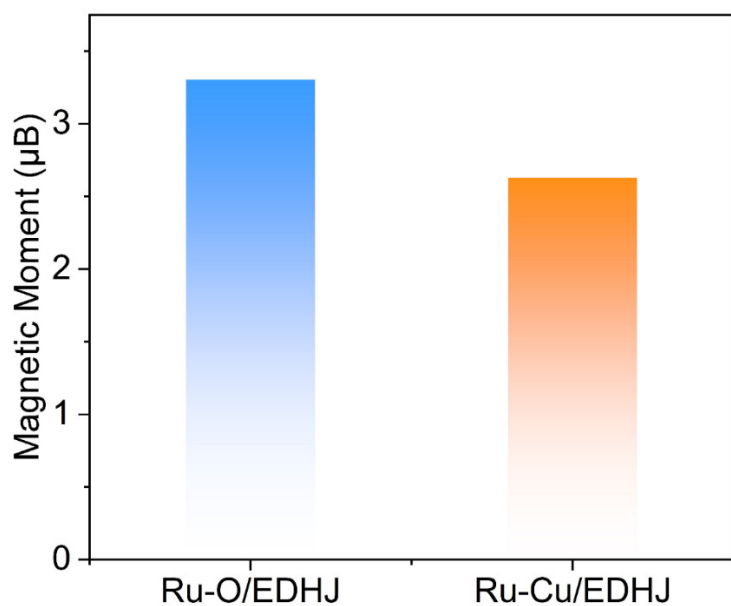

**Supplementary Fig. 18.** Calculated magnetic moment statistics of Ru of Ru-O/EDHJ and Ru-Cu/EDHJ. Source data are provided as a Source Data file.

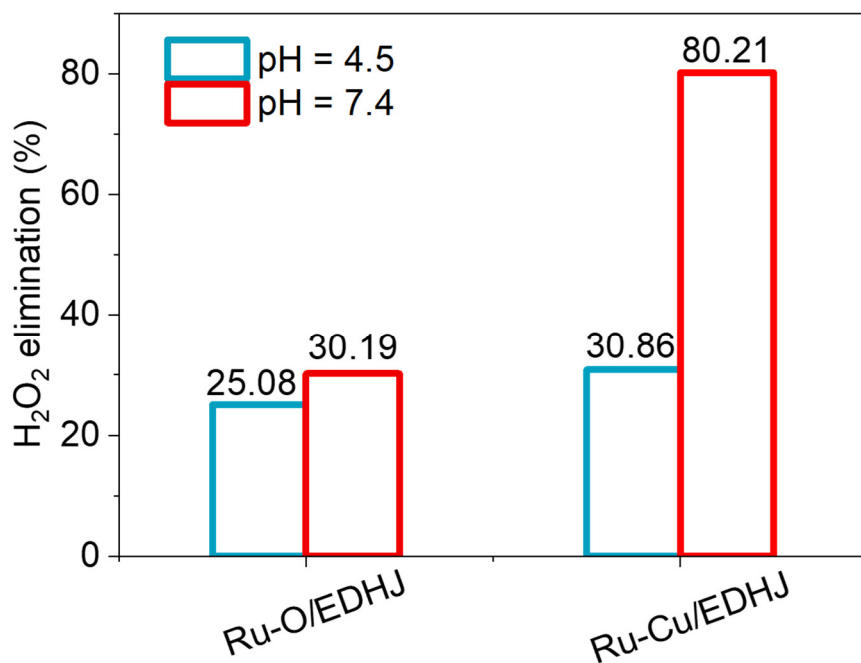

**Supplementary Fig. 19.** H<sub>2</sub>O<sub>2</sub> elimination ratio of Ru-O/EDHJ and Ru-Cu/EDHJ at different pH values. Experiments were repeated independently three times with similar results. Source data are provided as a Source Data file.

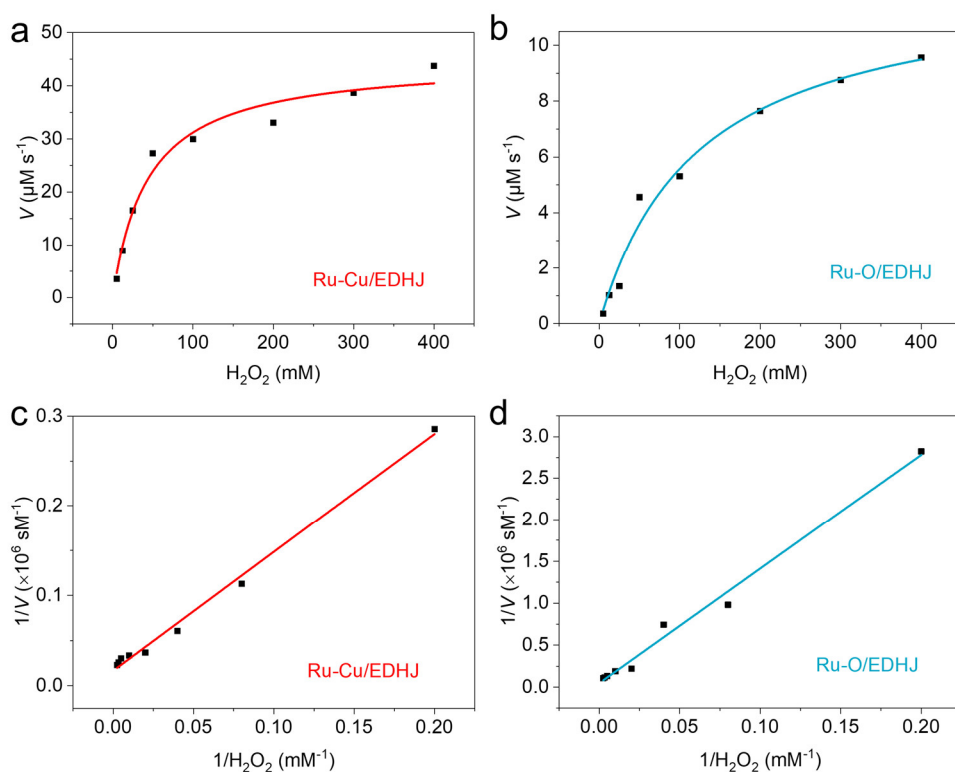

**Supplementary Fig. 20.** a-b Michaelis–Menten kinetic analysis and c-d Lineweaver–Burk plot for Ru-Cu/EDHJ, and Ru-O/EDHJ with H<sub>2</sub>O<sub>2</sub> as substrate. Source data are provided as a Source Data file.

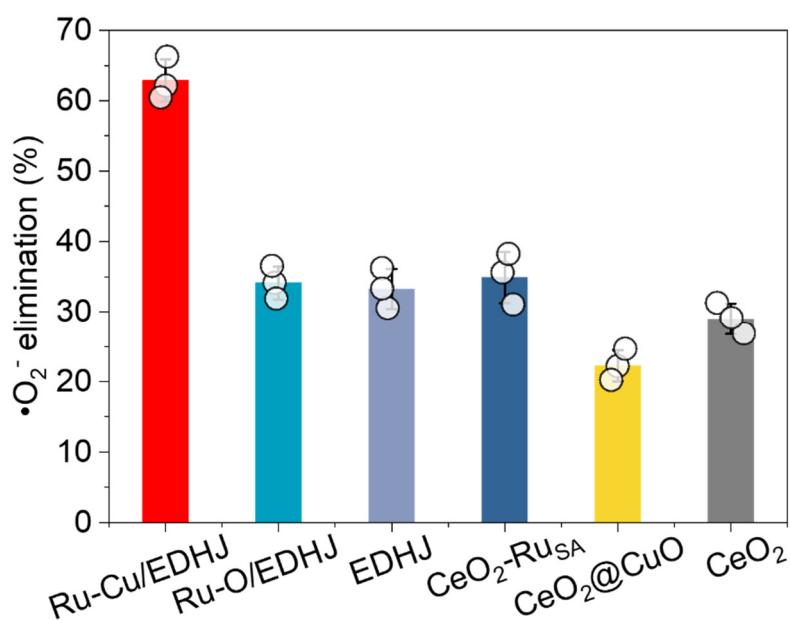

**Supplementary Fig. 21.** Superoxide dismutase (SOD)-like activity of different catalysts. Experiments were repeated independently three times with similar results.  $n = 3$  independent replicates. All error bars represent mean  $\pm$  SD. Source data are provided as a Source Data file.

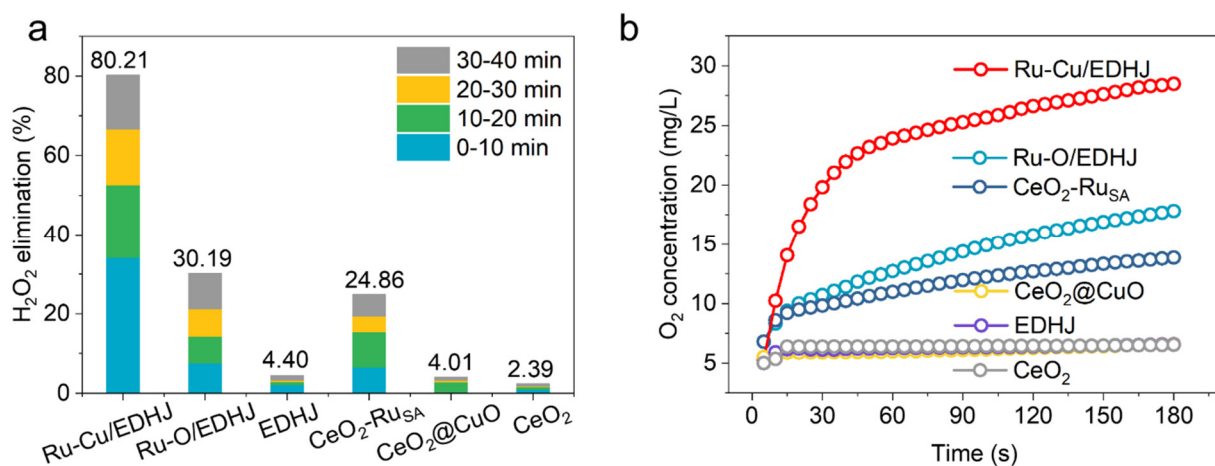

**Supplementary Fig. 22.** **a**  $\text{H}_2\text{O}_2$  elimination ratio of different catalysts. **b** The  $\text{O}_2$  concentration produced by different catalysts was measured by an oxygen dissolving meter in the presence of  $\text{H}_2\text{O}_2$ . Experiments were repeated independently three times with similar results. Source data are provided as a Source Data file.

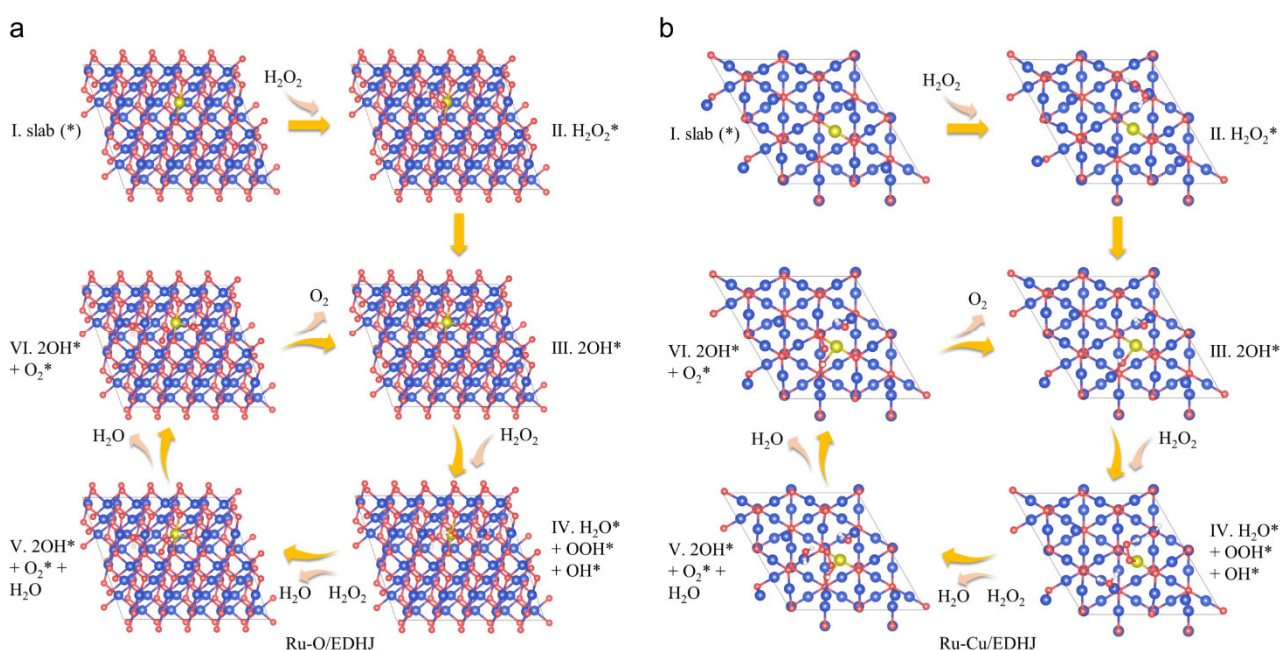

**Supplementary Fig. 23.** Proposed catalase (CAT)-like catalytic reaction pathways of **a** Ru-O/EDHJ and **b** Ru-Cu/EDHJ. Atomic color coding in the structure: Ru, yellow; Cu, blue; O, red; and H, white.

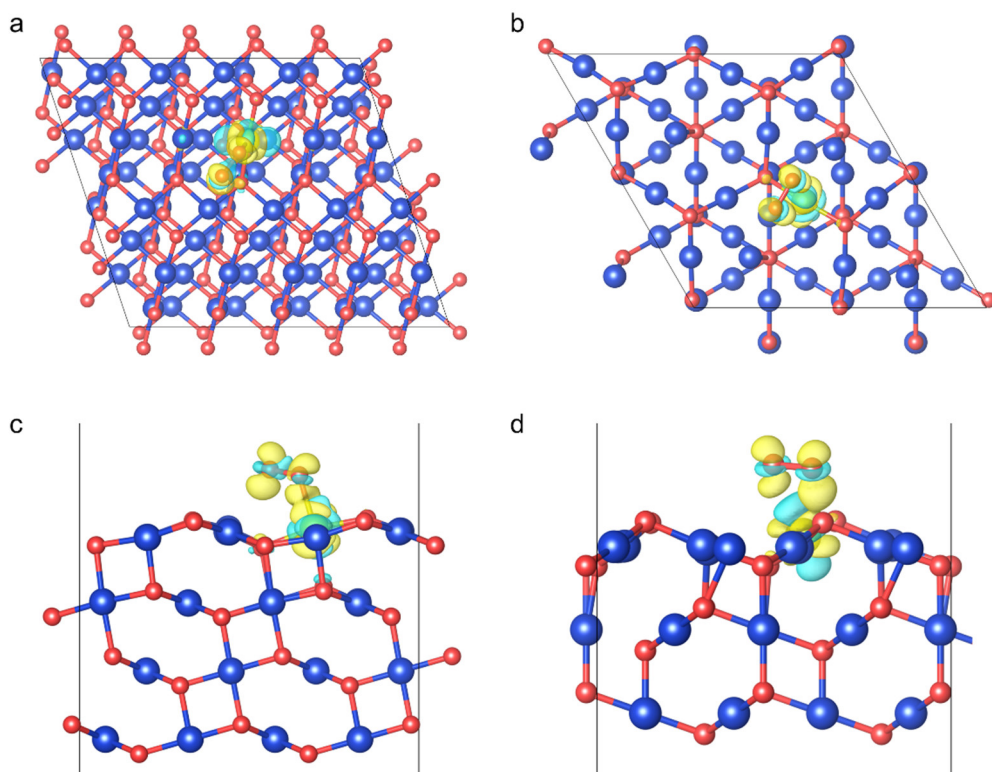

**Supplementary Fig. 24.** Differential charge density analysis of  $\text{O}_2^*$  in **a, c** Ru-O/EDHJ and **b, d** Ru-Cu/EDHJ (cyan and yellow represent charge depletion and accumulation, respectively, the cut-off of the density-difference isosurface is  $0.006 \text{ e} \cdot \text{Bohr}^{-3}$ ). Atomic color coding in the structure: Ru, yellow; Cu, blue; and O, red.

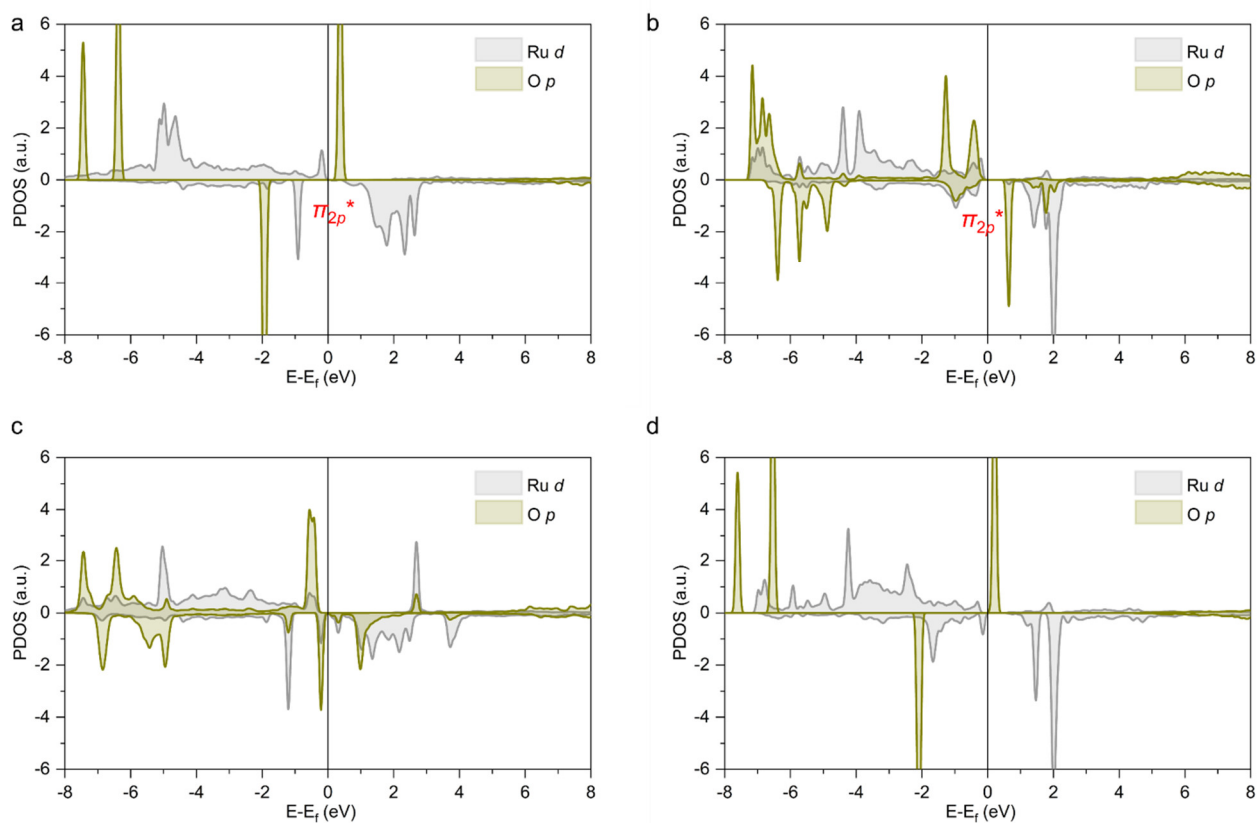

**Supplementary Fig. 25.** Calculated PDOS **a-b** before ( $M-O_2$ ) and **c-d** after ( $M^*O_2$ ) the interaction of  $O_2$  with **a, c** Ru-O/EDHJ and **b, d** Ru-Cu/EDHJ. Source data are provided as a Source Data file.

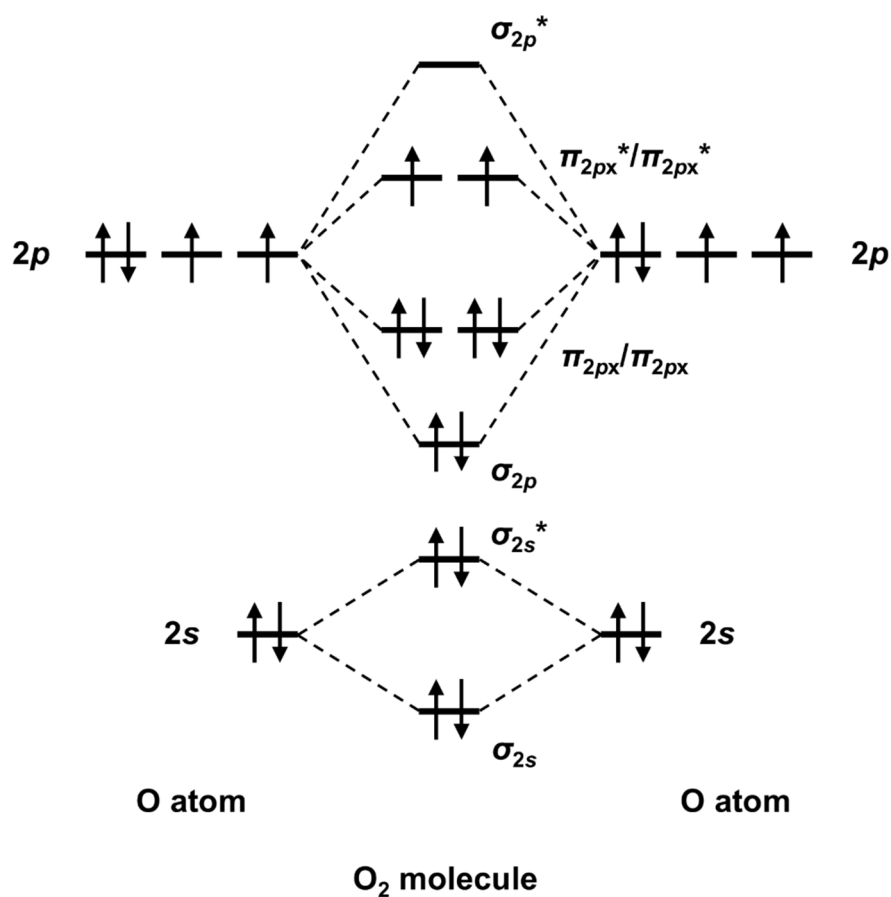

Supplementary Fig. 26. Molecular orbital diagram of  $\text{O}_2$ .

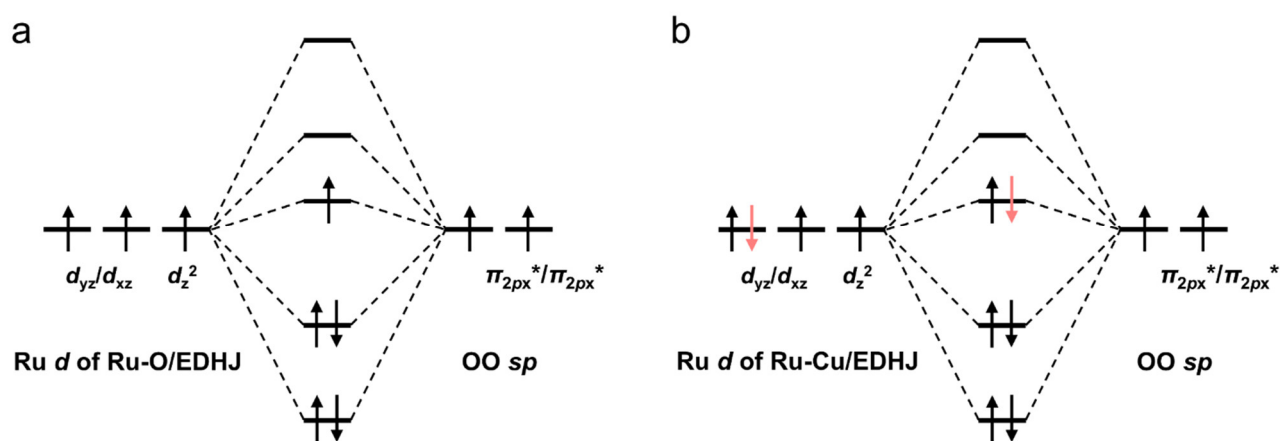

Supplementary Fig. 27. Molecular orbital diagrams of  $\text{Ru-O}_2^*$  of **a** Ru-O/EDHJ and **b** Ru-Cu/EDHJ.

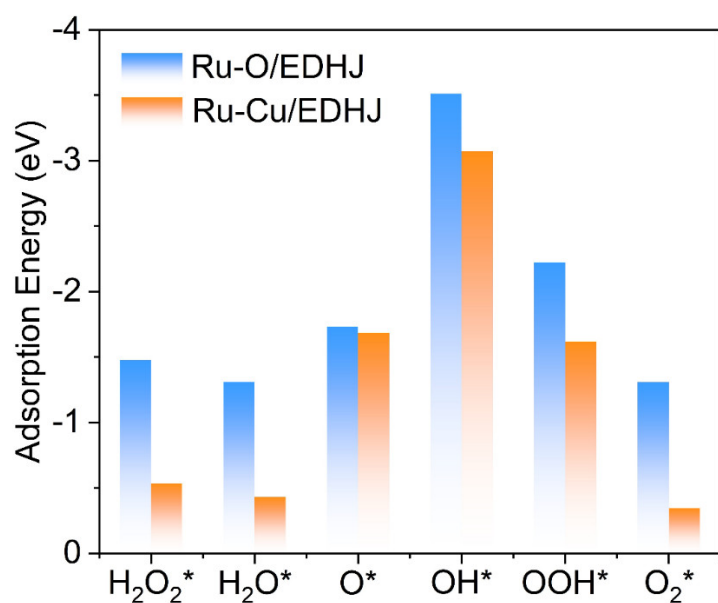

**Supplementary Fig. 28.** Calculated adsorption energy of Ru-O/EDHJ and Ru-Cu/EDHJ with different oxygen-containing intermediates. Source data are provided as a Source Data file.

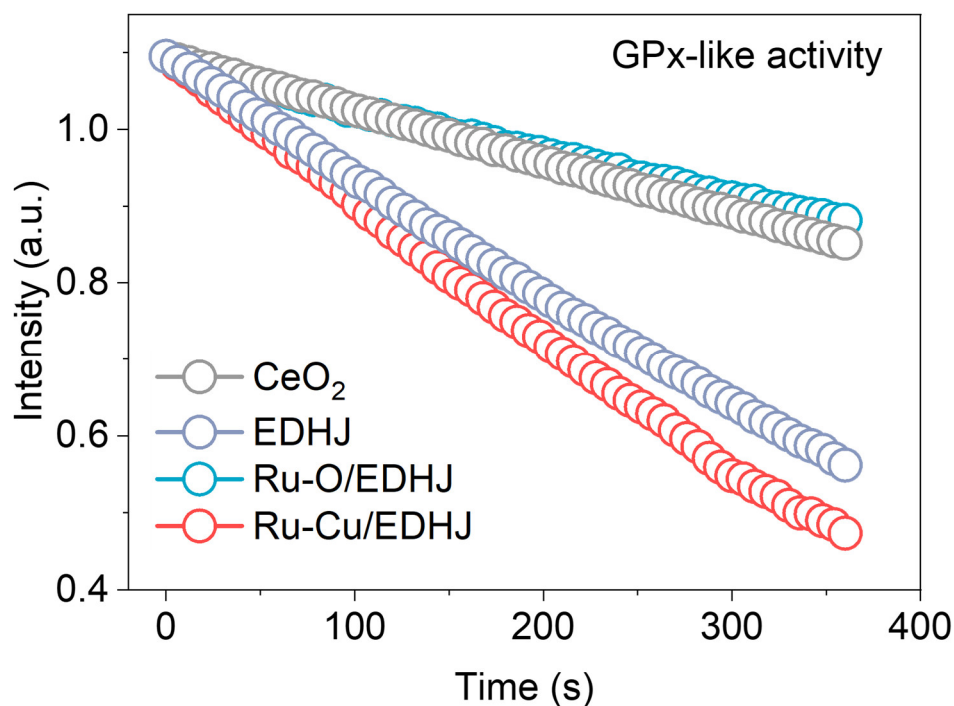

**Supplementary Fig. 29.** Time-dependent glutathione peroxidase (GPx)-like activity of different materials. Experiments were repeated independently three times with similar results. Source data are provided as a Source Data file.



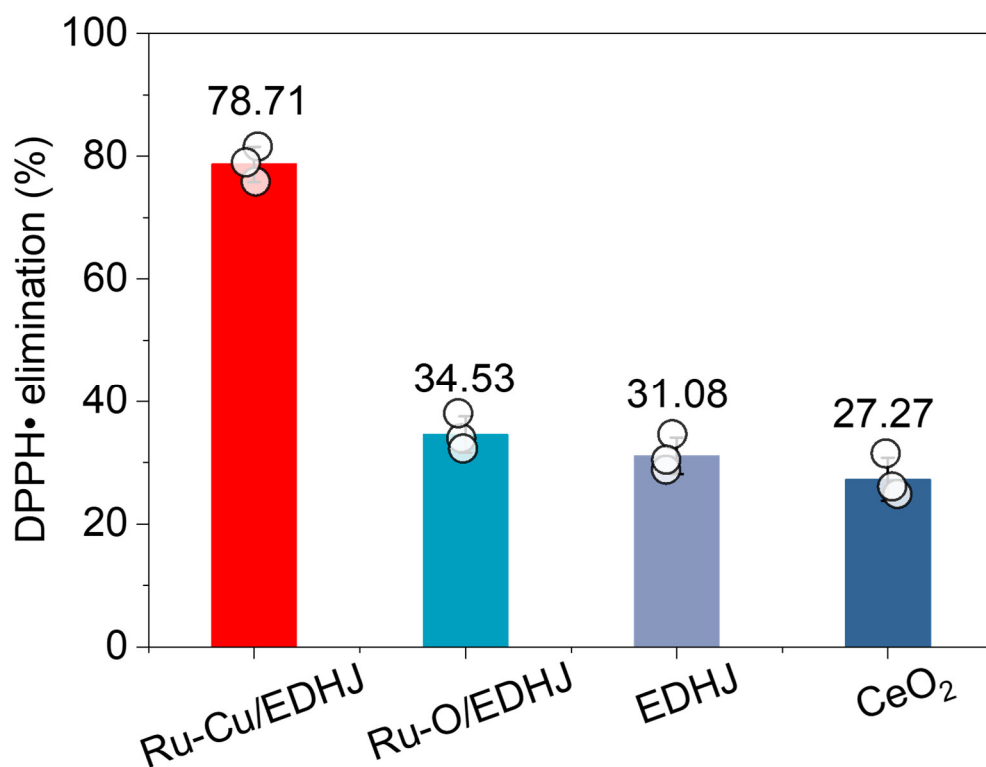

**Supplementary Fig. 30.** 1,1-diphenyl-2-picryl-hydrazyl radical (DPPH•) elimination rate of Ru-Cu/EDHJ, Ru-O/EDHJ, EDHJ, and CeO<sub>2</sub>. Experiments were repeated independently three times with similar results. n = 3 independent replicates. All error bars represent mean  $\pm$  SD. Source data are provided as a Source Data file.

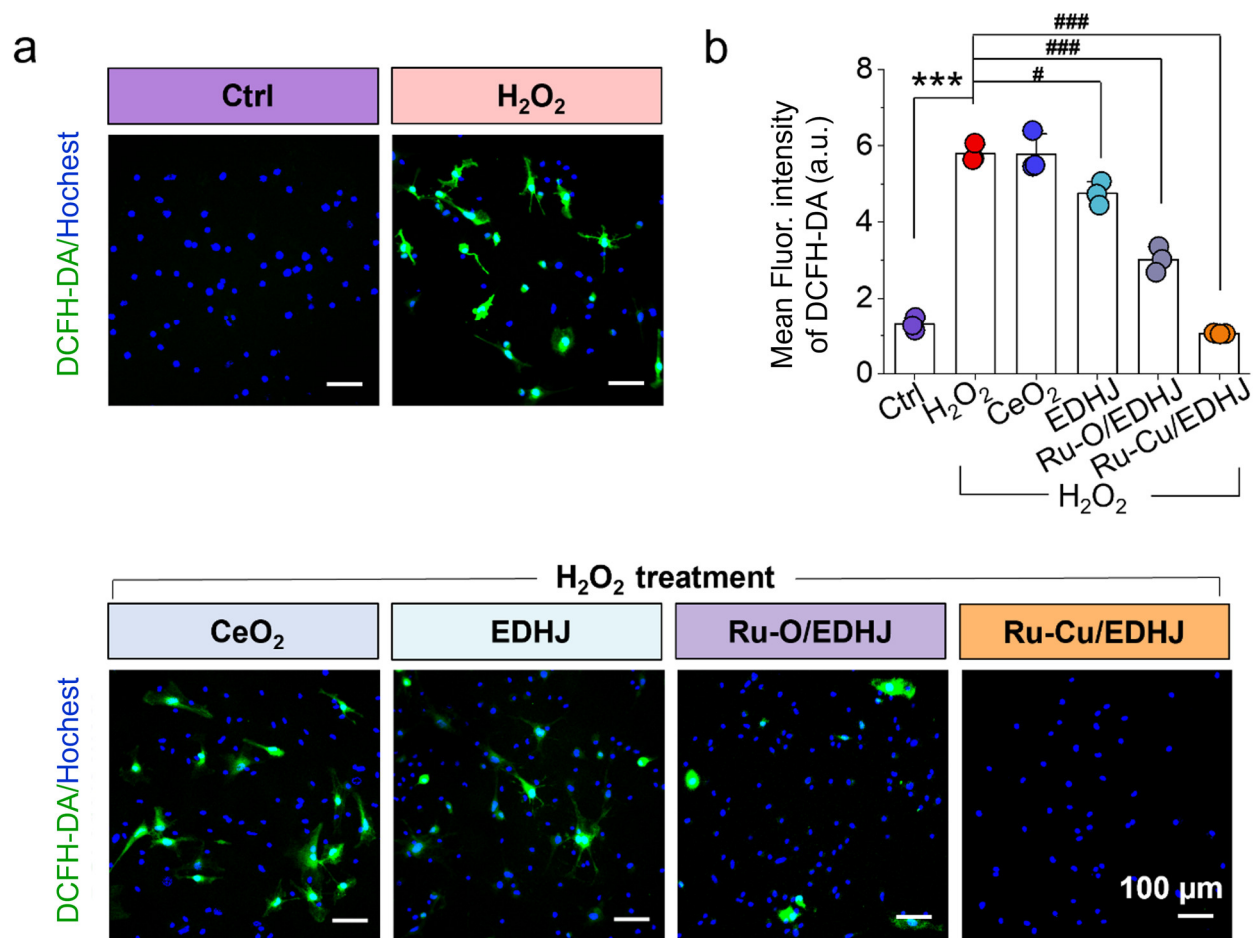

**Supplementary Fig. 31. a** Fluorescence images, Ctrl (PBS), **b** and mean fluorescence intensity of 2,7-dichlorodihydrofluorescein diacetate (DCFH-DA) staining of ROS in mMSCs ( $n = 3$  independent replicates),  $p_{(H_2O_2)} < 0.0001$ ,  $p_{(EDHJ-H_2O_2)} = 0.0144$ ,  $p_{(Ru-O/EDHJ-H_2O_2)} < 0.0001$ ,  $p_{(Ru-Cu/EDHJ-H_2O_2)} < 0.0001$ . Scale bars: 100  $\mu$ m. Data are presented as means  $\pm$  SD., \*\*\* $p < 0.001$ , # $p < 0.05$ , ### $p < 0.001$ ; one-way ANOVA with multiple comparisons test. Source data are provided as a Source Data file.

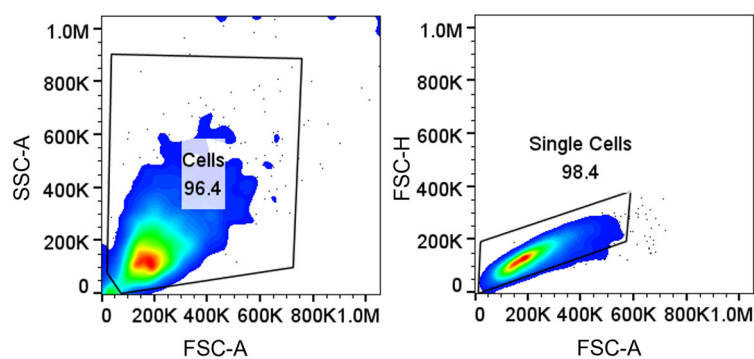

**Supplementary Fig. 32. A** Gating strategy for Fig. 5b.

IC50 = 426.4  $\mu\text{g/mL}$

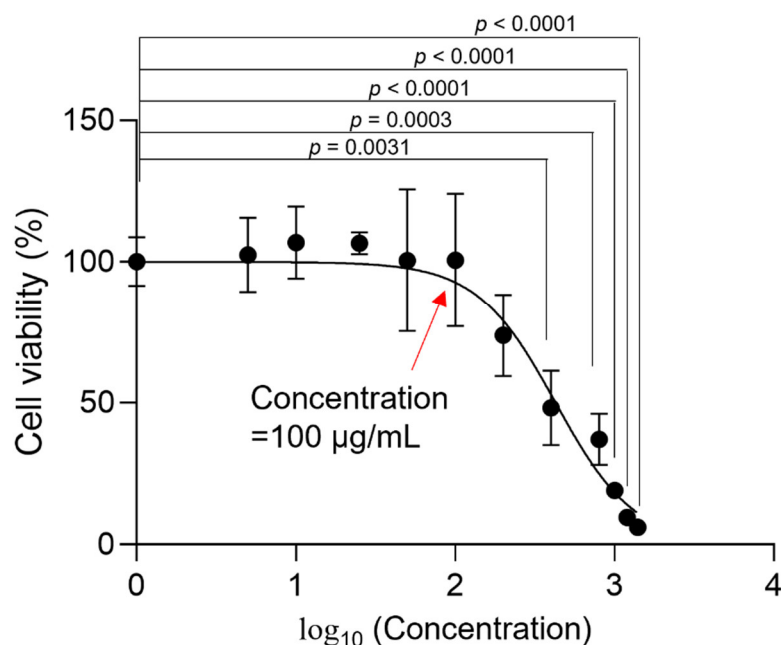

**Supplementary Fig. 33.** Quantitative analysis of cell viability for Ru-Cu/EDHJ without  $\text{H}_2\text{O}_2$  using the Cell Counting Kit-8 (CCK-8), inhibitory concentration ( $\text{IC}_{50}$ ) = 426.4  $\mu\text{g/mL}$  ( $n = 3$  independent replicates). Data are presented as means  $\pm$  SD., one-way ANOVA with multiple comparisons test. Source data are provided as a Source Data file.

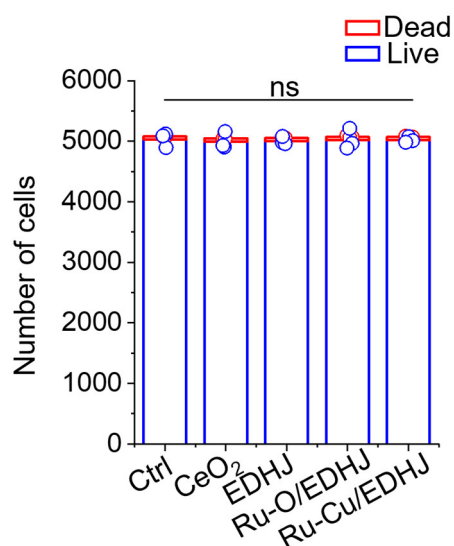

**Supplementary Fig. 34.** The number of cells with different materials counted after Live/Dead staining ( $n = 3$  independent replicates). Data are presented as means  $\pm$  SD.; ns indicates no significance; one-way ANOVA with multiple comparisons test. Source data are provided as a Source Data file.

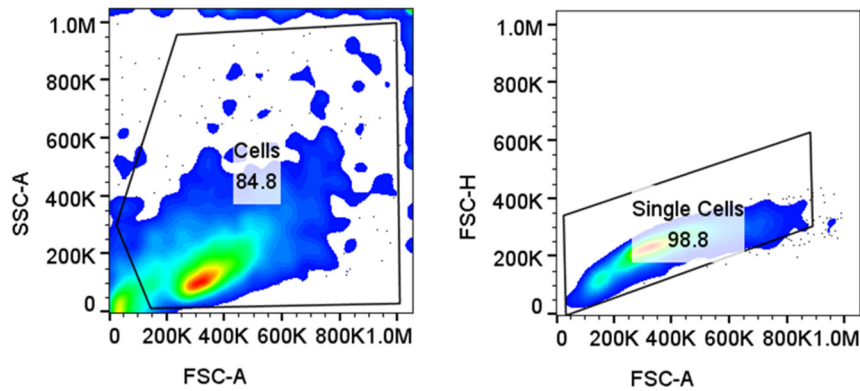

**Supplementary Fig. 35.** A Gating strategy for Fig. 6g.

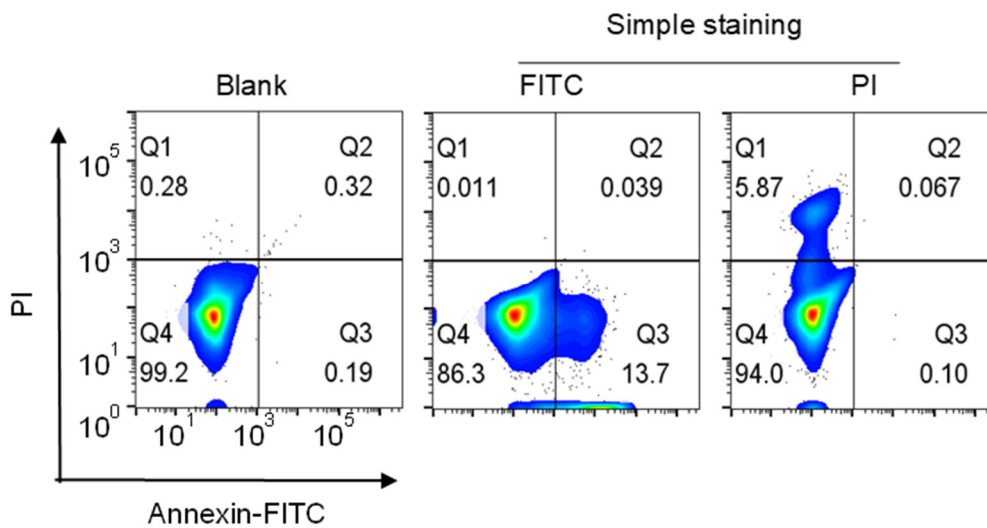

**Supplementary Fig. 36.** Apoptosis analysis by flow cytometry of Annexin V-FITC/PI stained hMSCs. The blank group indicates no staining; FITC and PI groups are single-dye staining with FITC and PI, respectively (n = 3 independent replicates).

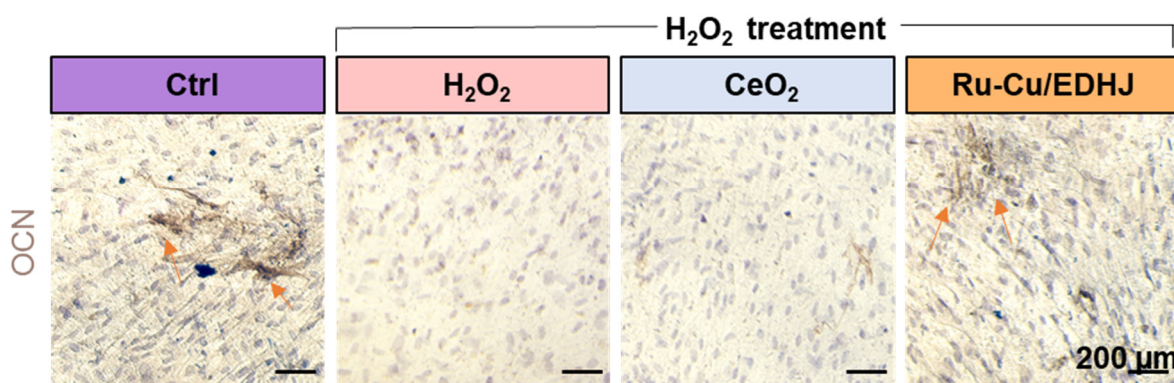

**Supplementary Fig. 37.** Immunohistochemical staining images of osteocalcin (OCN) in hMSCs, orange arrow indicates the positive expression area (n = 3 independent replicates). Scale bars: 200  $\mu$ m.

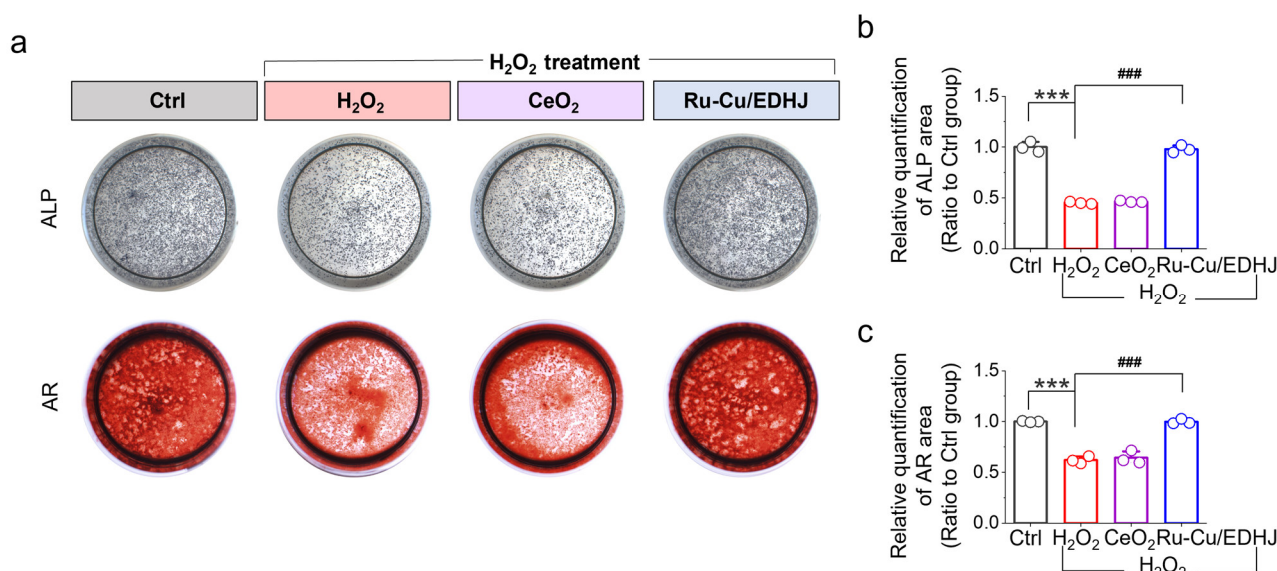

**Supplementary Fig. 38.** **a** Alkaline phosphatase (ALP) staining after 3-day *in vitro* osteo-induction and alizarin red (AR) staining after 21-day *in vitro* osteo-induction using the mMSCs. Quantitative analysis of **b** ALP (n = 3 independent replicates),  $p_{(H_2O_2)} < 0.0001$ ,  $p_{(Ru-Cu/EDHJ-H_2O_2)} < 0.0001$ , and **c** AR (n = 3 independent replicates) in H<sub>2</sub>O<sub>2</sub> treated mMSCs,  $p_{(H_2O_2)} < 0.0001$ ,  $p_{(Ru-Cu/EDHJ-H_2O_2)} < 0.0001$ . Data are presented as means  $\pm$  SD., \*\*\* $p < 0.001$ , ### $p < 0.001$ ; one-way ANOVA with multiple comparisons test. Source data are provided as a Source Data file.

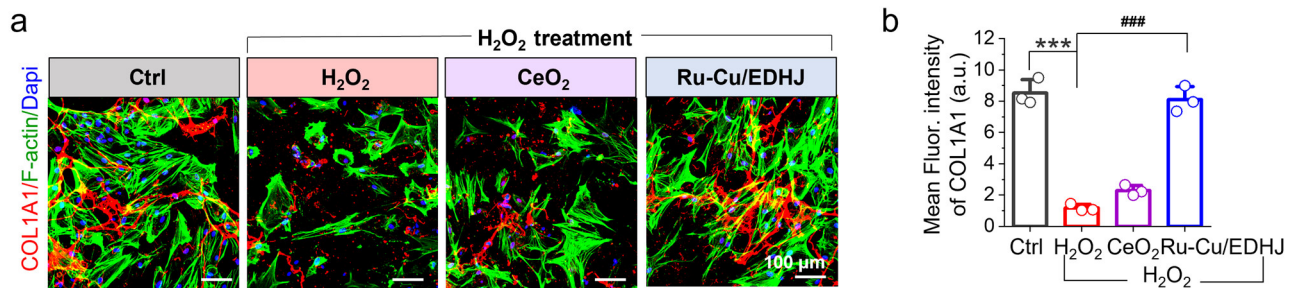

**Supplementary Fig. 39. a** Fluorescence images of COL1A1. Scale bar: 100 μm. **b** Quantitative results of fluorescence intensity from COL1A1 (n = 3 independent replicates),  $p_{(H_2O_2)} < 0.0001$ ,  $p_{(Ru-Cu/EDHJ-H_2O_2)} < 0.0001$ . Data are presented as means  $\pm$  SD., \*\*\* $p < 0.001$ , ### $p < 0.001$ , one-way ANOVA with multiple comparisons test. Source data are provided as a Source Data file.

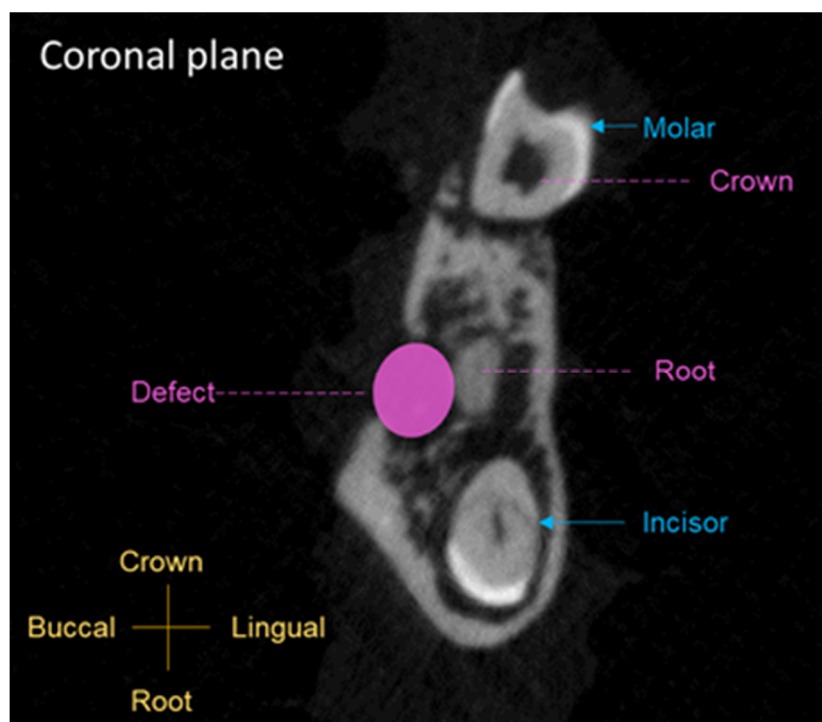

**Supplementary Fig. 40.** The coronal plane of the mouse mandible by a micro-CT image to show the jaw defect model.



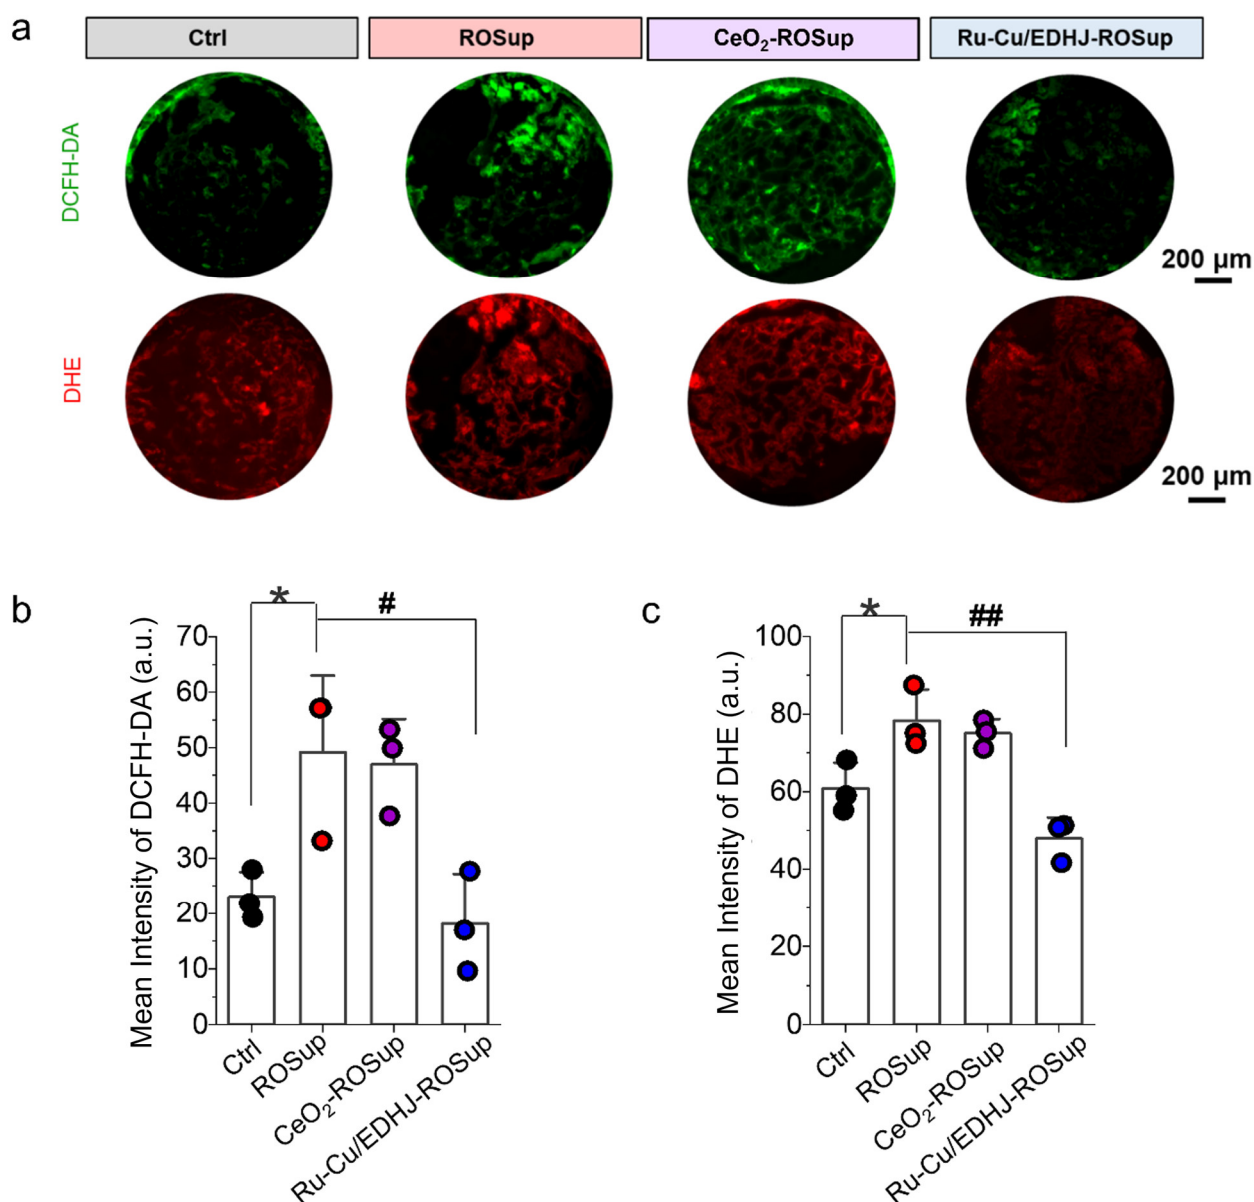

**Supplementary Fig. 41. a** Fluorescence staining images of 2,7-dichlorodihydrofluorescein diacetate (DCFH-DA) and dihydroethidium (DHE) at week 1 after operation. ROSup means ROS raised up after LPS stimulation. **b** Quantitative results of fluorescence intensity of DCFH-DA ( $n = 3$  independent replicates),  $p_{(\text{ROSup})} = 0.0396$ ,  $p_{(\text{Ru-Cu/EDHJ-ROSup})} = 0.0166$ . **c** Quantitative results of fluorescence intensity of DHE ( $n = 3$  independent replicates),  $p_{(\text{ROSup})} = 0.0340$ ,  $p_{(\text{Ru-Cu/EDHJ-ROSup})} = 0.0014$ . Ctrl (mandible defects with PBS treatment). Data are presented as means  $\pm$  SD.,  $*p < 0.05$ ,  $\#p < 0.05$ ,  $##p < 0.01$ ; one-way ANOVA with multiple comparisons test. Scale bars: 200  $\mu$ m. Source data are provided as a Source Data file.

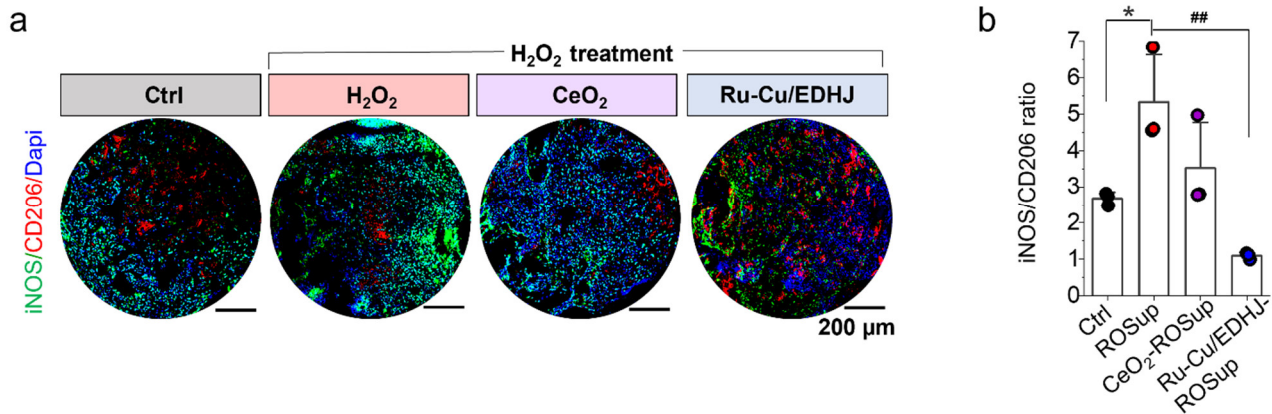

**Supplementary Fig. 42. a** Double immunofluorescence staining of tissue sections from mandibular defect area for iNOS and CD206 markers, and **b** corresponding quantitative analysis of ratio of iNOS/CD206 ( $n = 3$  independent replicates),  $p_{(\text{ROSUp})} = 0.0304$ ,  $p_{(\text{Ru-Cu/EDHJ-ROSUp})} = 0.0021$ . Ctrl (mandible defects with PBS treatment). Data are presented as means  $\pm$  SD.,  $*p < 0.05$ ,  $##p < 0.01$ , one-way ANOVA with multiple comparisons test. Scale bars: 200  $\mu\text{m}$ . Source data are provided as a Source Data file.

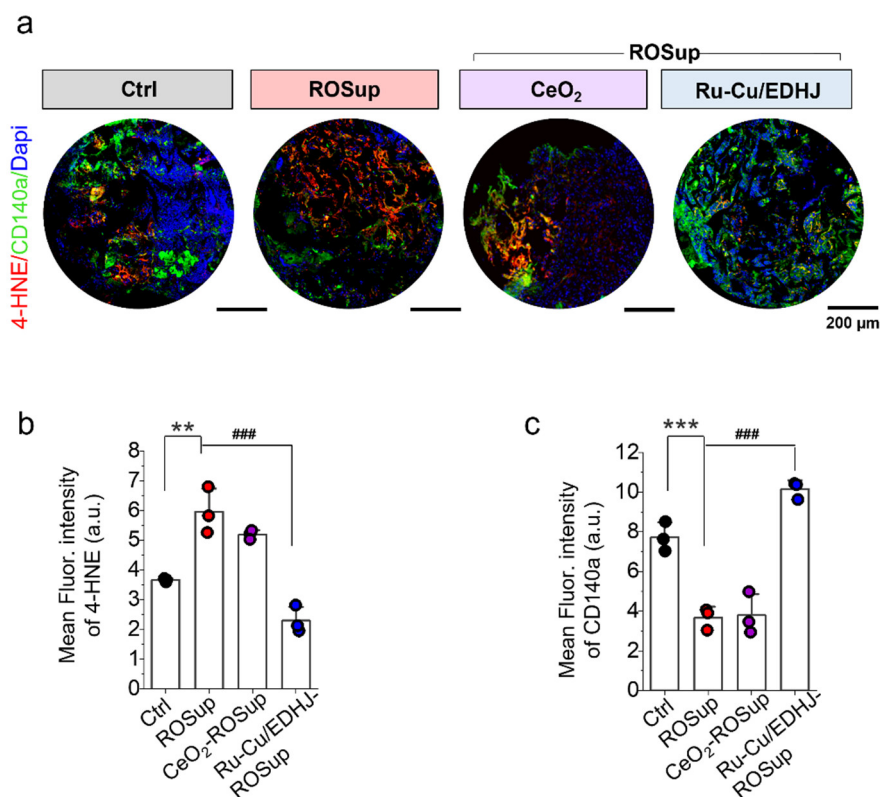

**Supplementary Fig. 43. a** Fluorescence staining images of 4-hydroxynonenal (4-HNE) and CD140a (platelet-derived growth factor receptor  $\alpha$ ), at week 1 after operation. **b** Quantitative results of



fluorescence intensity of 4-HNE ( $n = 3$  independent replicates),  $p_{(\text{ROSUp})} = 0.0012$ ,  $p_{(\text{Ru-Cu/EDHJ-ROSUp})} < 0.0001$ . **c** Quantitative results of fluorescence intensity of CD140a ( $n = 3$  independent replicates),  $p_{(\text{ROSUp})} = 0.0007$ ,  $p_{(\text{Ru-Cu/EDHJ-ROSUp})} < 0.0001$ . Ctrl (mandible defects with PBS treatment). Data are presented as means  $\pm$  SD.,  $**p < 0.01$ ,  $***p < 0.001$ ,  $###p < 0.001$ ; one-way ANOVA with multiple comparisons test. Scale bars: 200  $\mu\text{m}$ . Source data are provided as a Source Data file.

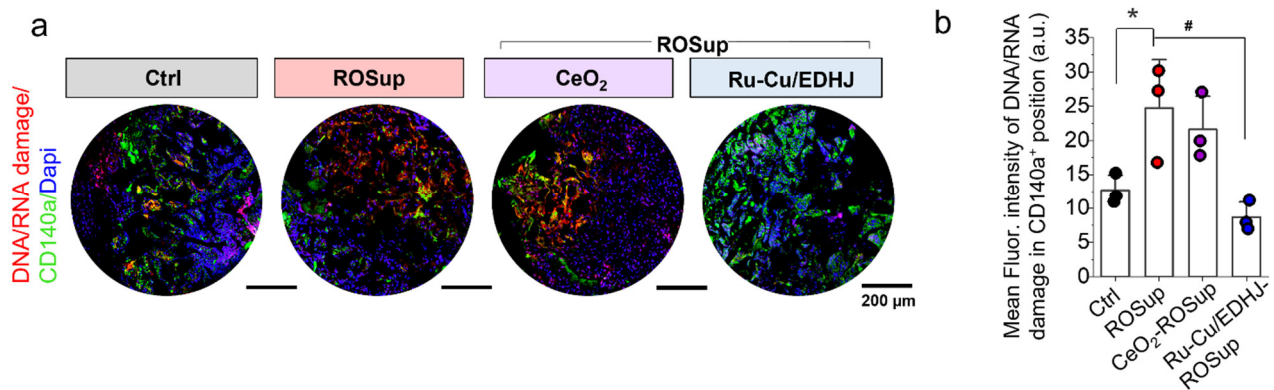

**Supplementary Fig. 44. a** Fluorescence staining images of DNA/RNA damage and CD140a (platelet-derived growth factor receptor alpha), at week 1 after operation. **b** Quantitative results of mean fluorescence intensity of DNA/RNA damage in CD140a<sup>+</sup> position ( $n = 3$  independent replicates),  $p_{(\text{ROSUp})} = 0.0469$ ,  $p_{(\text{Ru-Cu/EDHJ-ROSUp})} = 0.0110$ . Ctrl (mandible defects with PBS treatment). Data are presented as means  $\pm$  SD.,  $*p < 0.05$ ,  $#p < 0.05$ , one-way ANOVA with multiple comparisons test. Scale bars: 200  $\mu\text{m}$ . Source data are provided as a Source Data file.

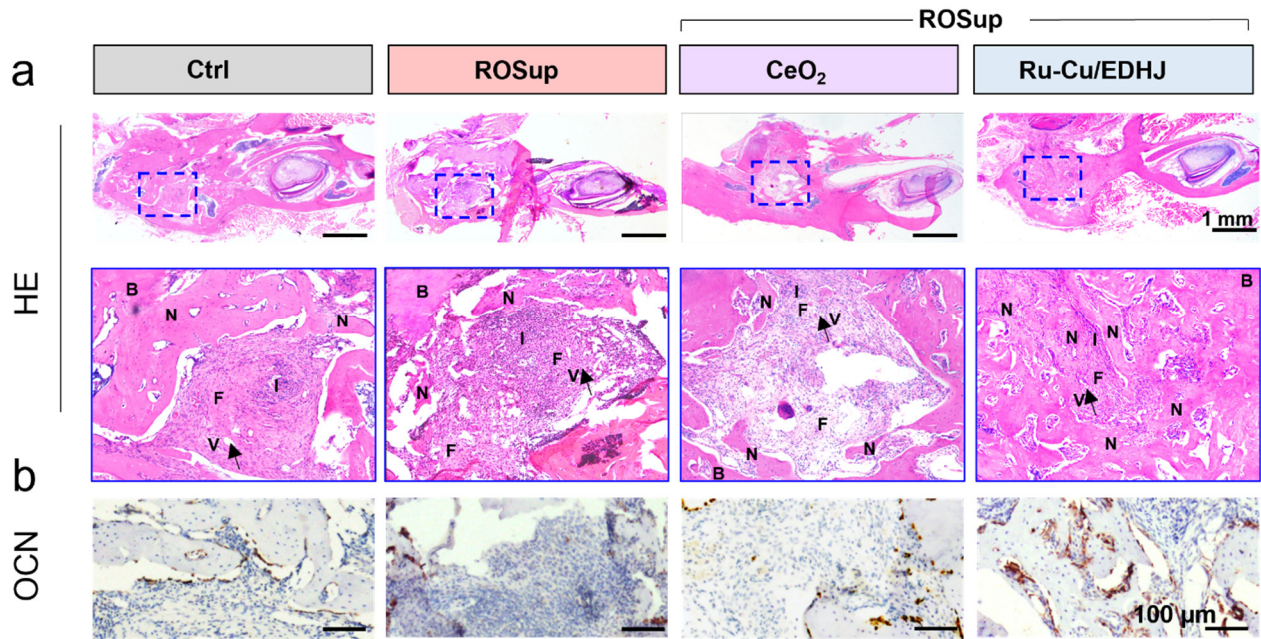

**Supplementary Fig. 45. a** Hematoxylin and Eosin (H&E) staining of regenerated bones induced by different scaffolds at week 8 after operation. Ctrl (mandible defects with PBS treatment). (Row 1: Overall observation of the mandible defect repair. Row 2: Magnified view of the center and boundary site of the defects). (N: new bone tissue. V: new blood vessels (black arrow). F: fibrous tissue. B: old bone. I: inflammatory infiltration). **b** Representative immunohistochemistry images of OCN. OCN (brown) and hematoxylin (blue). n = 3 independent replicates.

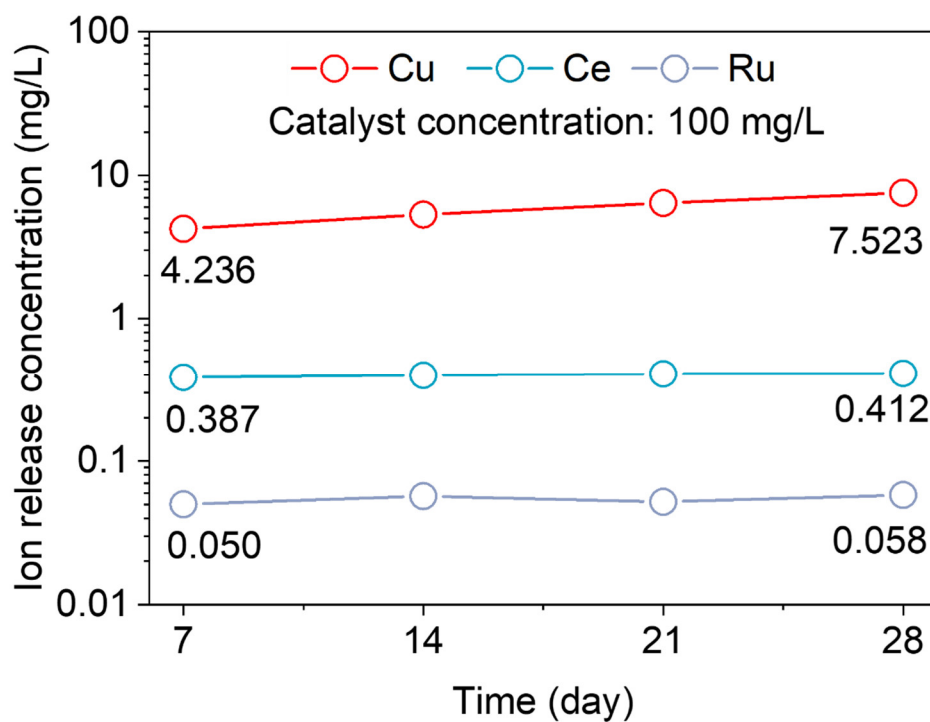

**Supplementary Fig. 46.** Inductively coupled plasma mass spectrometry (ICP-MS) was used to measure the concentration of ions released at different times. 1 mg of the Ru-Cu/EDHJ was immersed in 10 mL PBS to explore the degradation performance of the material over time *in vitro*. Source data are provided as a Source Data file.

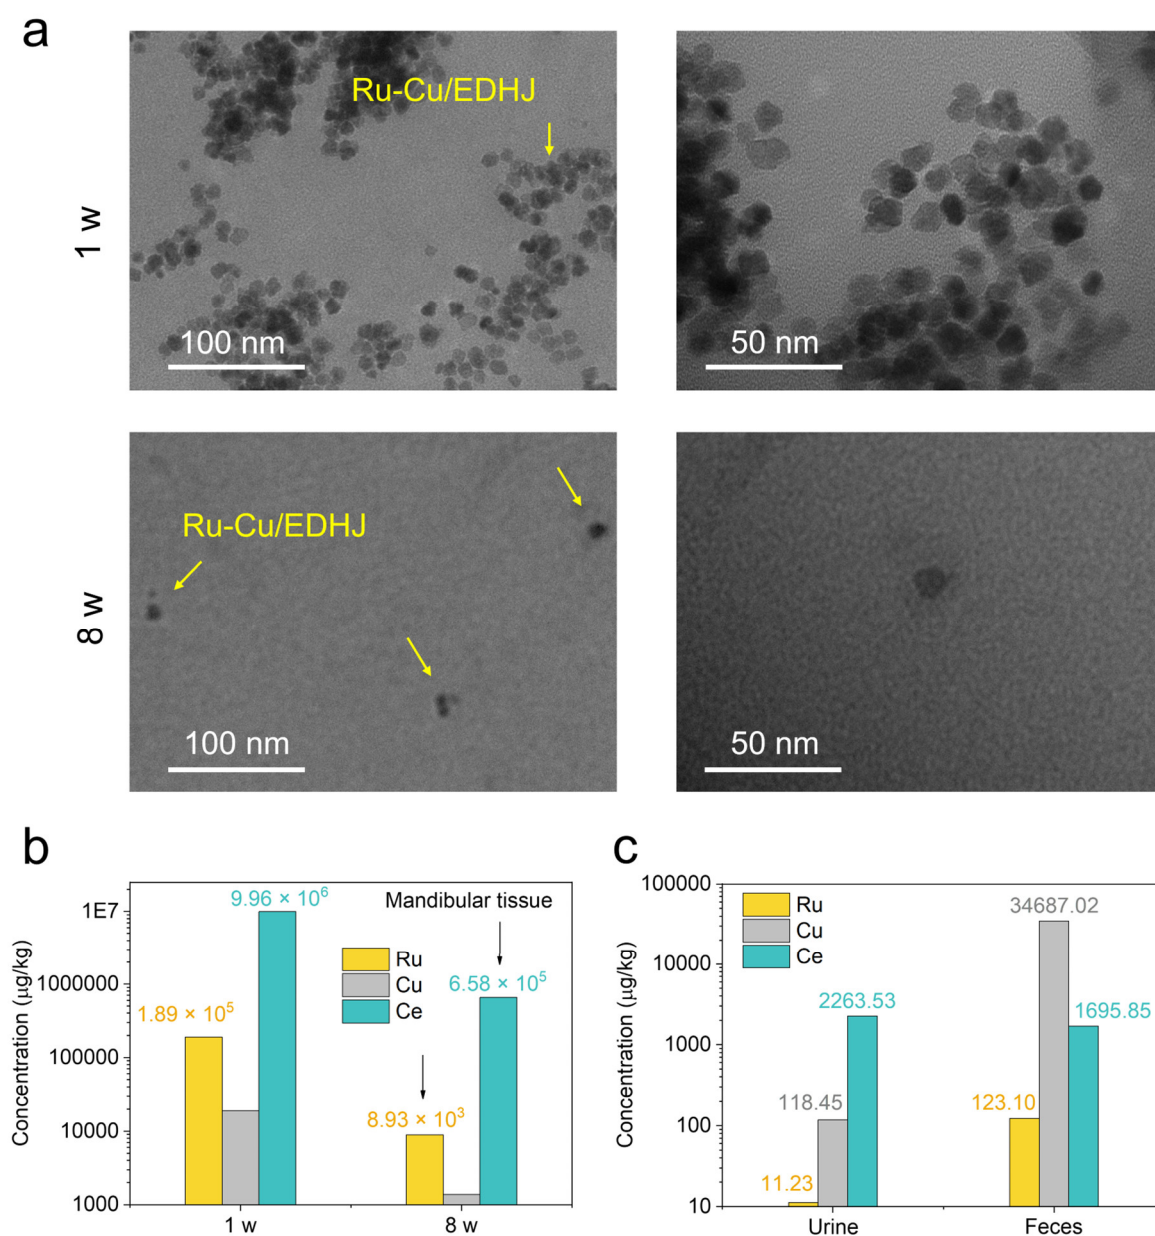

**Supplementary Fig. 47. a** The TEM images showcase the Ru-Cu/EDHJ materials obtained from the mandibular tissues captured at various time points after the implantation for 1 week and 8 weeks. Mandibular tissue samples were first fixed in osmium tetroxide, then dehydrated in acetone, followed by embedding in epoxy resin, and finally sectioned into ultra-thin slices for TEM imaging. **b** The ICP-MS test measured different metal ion concentrations in mandibular tissue after the implantation of the Ru-Cu/EDHJ for 1 week and 8 weeks. **c** The ICP-MS test measured different metal ion concentrations in mouse urine and feces after the implantation of the Ru-Cu/EDHJ for 4 weeks. Source data are provided as a Source Data file.



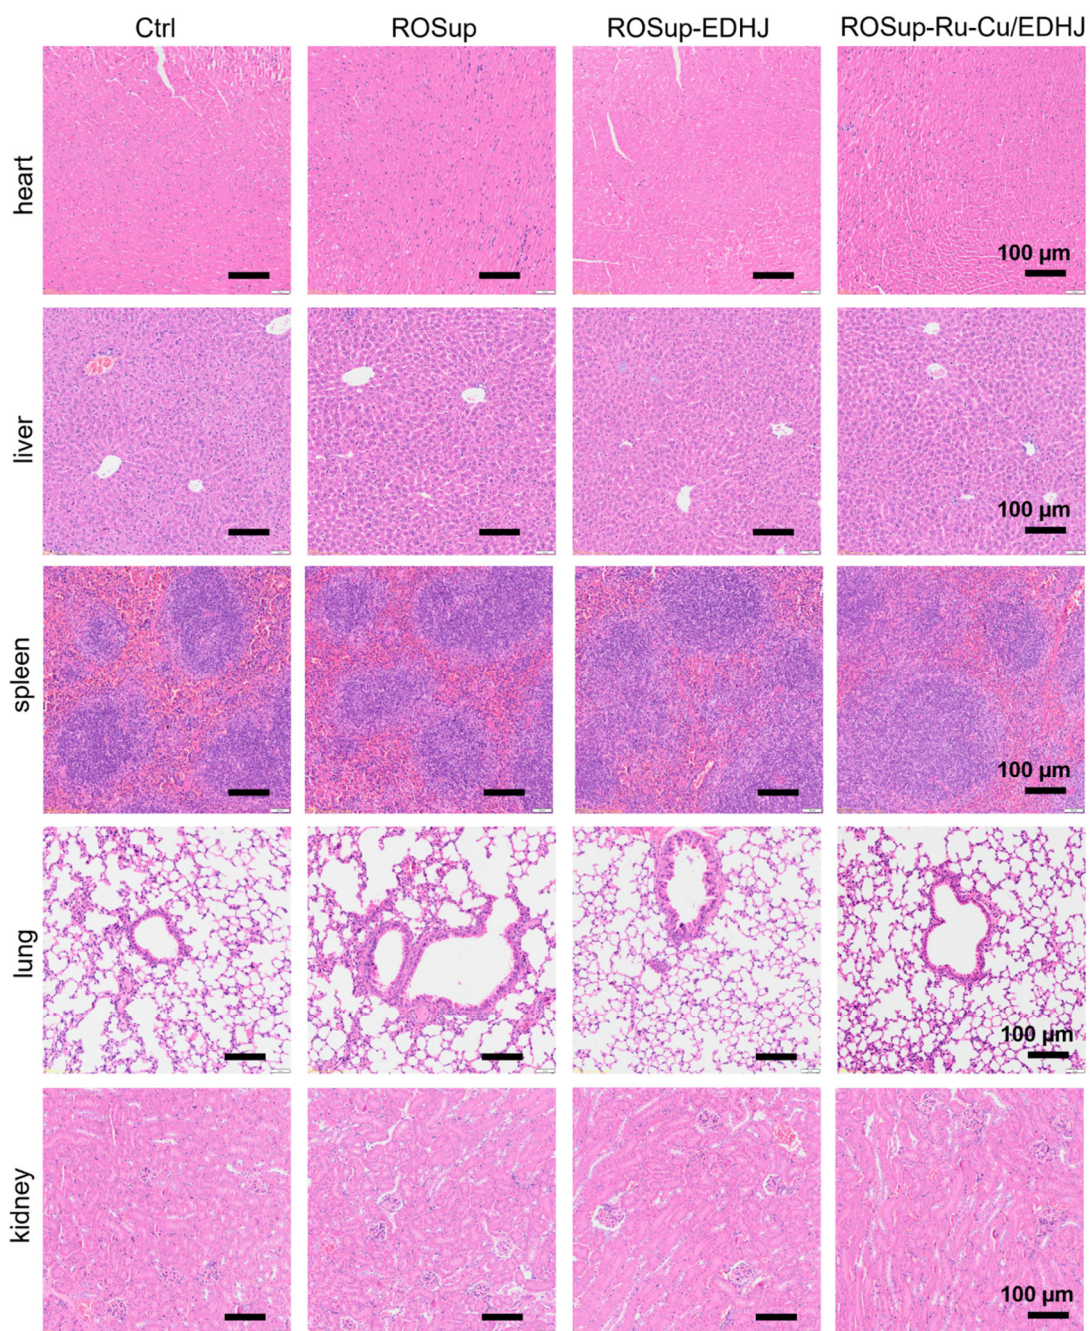

**Supplementary Fig. 48.** Paraffin-embedded heart, liver, spleen, lung, and kidney of mice on 14 days post-operation were sectioned and stained by H&E (n = 3 independent replicates). Scale bars: 100 µm.

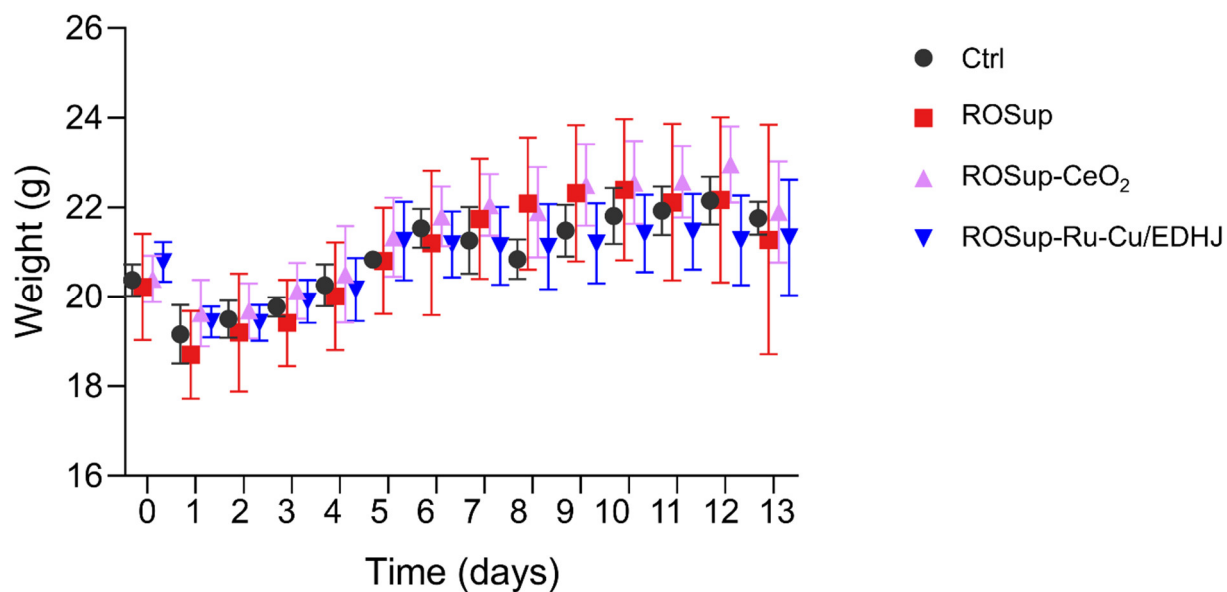

**Supplementary Fig. 49.** Quantification analysis of the weight of mice in different groups after operation for 14 days continuously (n = 3 independent samples). Source data are provided as a Source Data file.

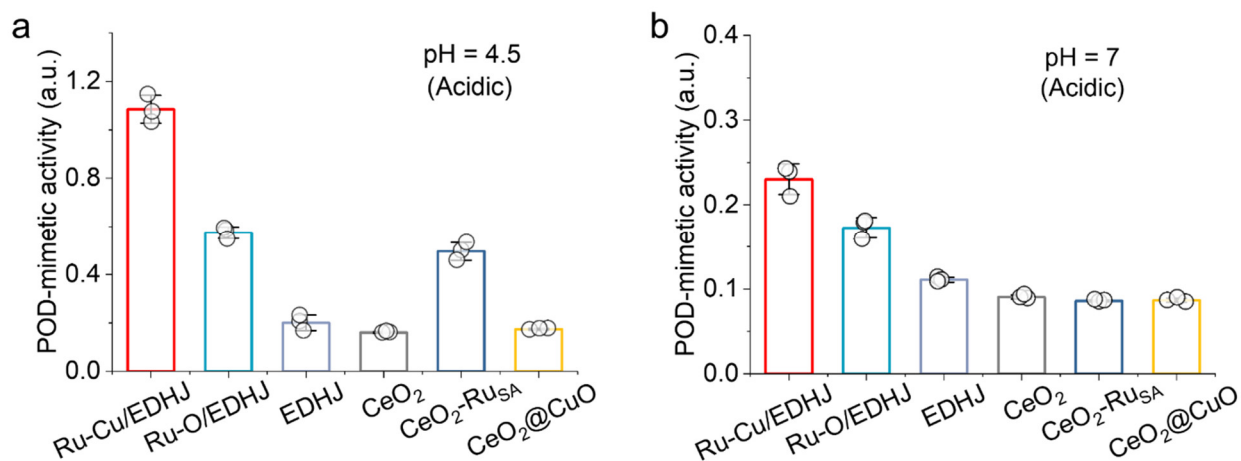

**Supplementary Fig. 50.** Peroxidase (POD)-mimetic activities of different catalysts at **a** pH 4.5 and **b** pH 7 (n = 3 independent replicates). All error bars represent mean  $\pm$  SD. Source data are provided as a Source Data file.

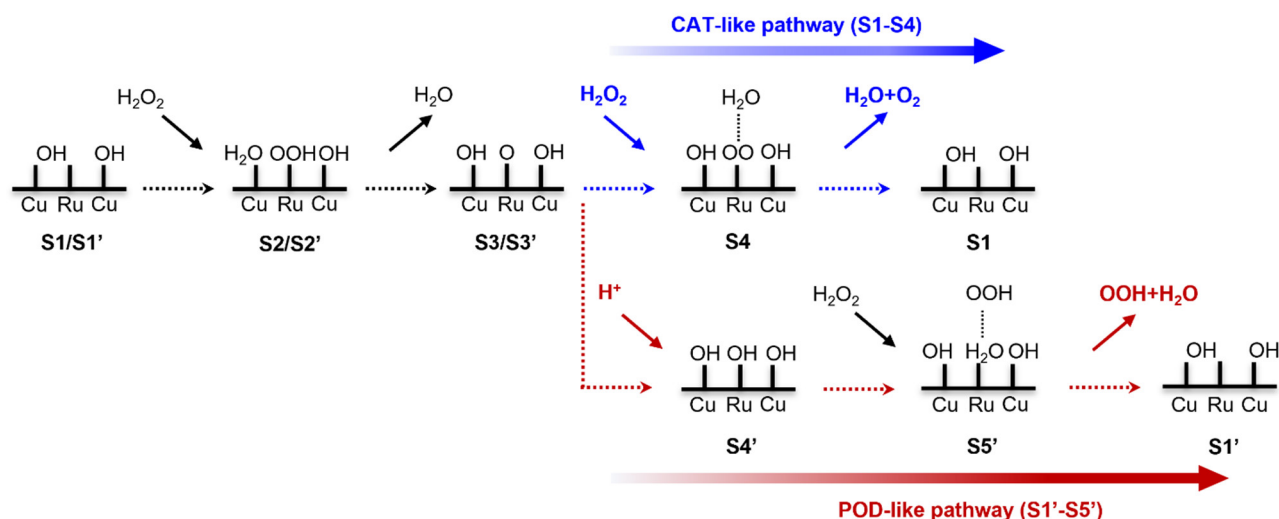

**Supplementary Fig. 51.** CAT-like and POD-like pathways of Ru-Cu/EDHJ. The Ru-Cu/EDHJ catalyst has demonstrated the ability to spontaneously catalyze  $H_2O_2$ , generating a significant quantity of  $\cdot OH$  intermediates (with Gibbs free energy of -3.658 eV) that promote the formation of OH-enriched surfaces. Consequently, we employed  $\cdot OH + \cdot OH$  as the reaction initial state ( $S1/S1'$ ) in this part.

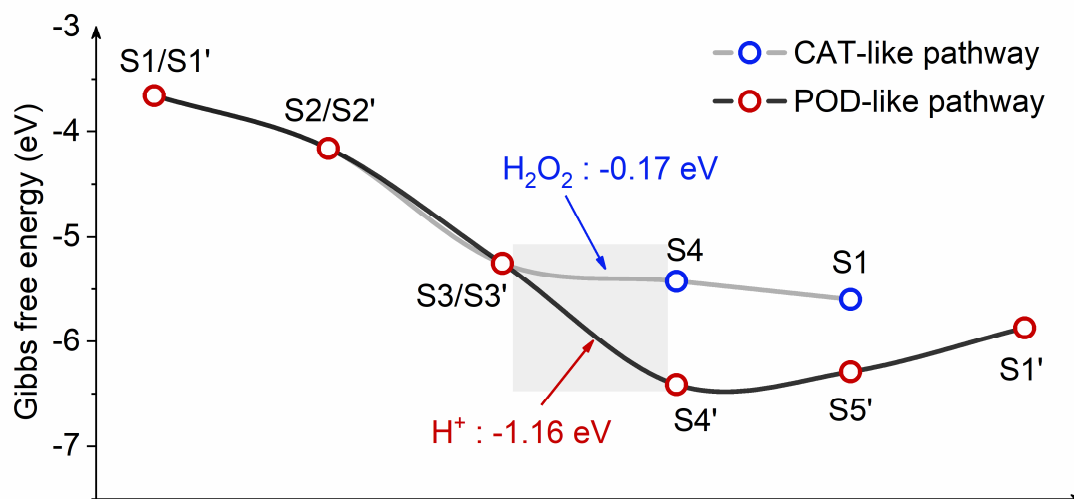

**Supplementary Fig. 52.** Gibbs free energy diagram of corresponding CAT-like and POD-like pathways for Ru-Cu/EDHJ. Source data are provided as a Source Data file.



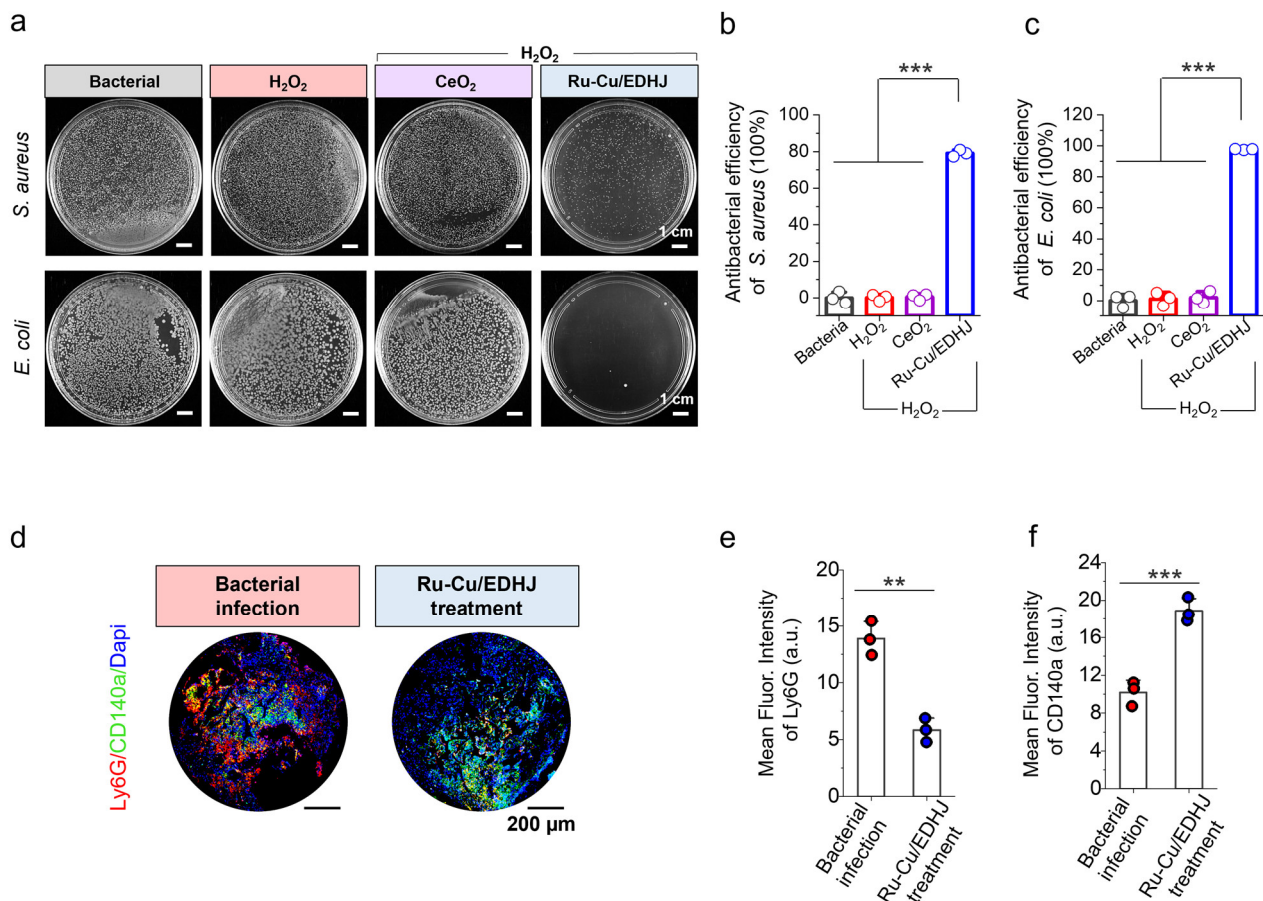

**Supplementary Fig. 53.** **a** Bacterial colonies formed by *S. aureus* and *E. coli* after incubating with PBS,  $H_2O_2$ ,  $CeO_2 + H_2O_2$ , or  $Ru-Cu/EDHJ + H_2O_2$ . **b** The corresponding antibacterial efficiency of *S. aureus* ( $n = 3$  independent replicates),  $p_{(Bacteria)} < 0.0001$ ,  $p_{(H_2O_2)} < 0.0001$ ,  $p_{(CeO_2-H_2O_2)} < 0.0001$ . Data are presented as means  $\pm$  SD.,  $***p < 0.001$ , one-way ANOVA with multiple comparisons test. **c** The corresponding antibacterial efficiency of *E. coli* ( $n = 3$  independent replicates),  $p_{(Bacteria)} < 0.0001$ ,  $p_{(H_2O_2)} < 0.0001$ ,  $p_{(CeO_2-H_2O_2)} < 0.0001$ . Data are presented as means  $\pm$  SD.,  $***p < 0.001$ , one-way ANOVA with multiple comparisons test. **d** Fluorescence staining images of Ly6G and CD140a at week 1 after operation. **e** Quantitative results of fluorescence intensity of Ly6G ( $n = 3$  independent replicates),  $p_{(Ru-Cu/EDHJ)} = 0.0016$ . Data are presented as means  $\pm$  SD.,  $**p < 0.01$ ,  $p$  values are assessed by unpaired Student's two-sided t-tests. **f** Quantitative results of fluorescence intensity of CD140a ( $n = 3$  independent replicates),  $p_{(Ru-Cu/EDHJ)} = 0.0010$ . Data are presented as means  $\pm$  SD.,  $***p < 0.001$ ,  $p$  values are assessed by unpaired Student's two-sided t-tests. All antibacterial experiments are performed in acidic conditions (PBS: pH 5.6). Source data are provided as a Source Data file.



## Supplementary Tables

**Supplementary Table 1.** The elemental contents in the biocatalysts that are determined by XPS measurements.

| XPS                                | Atomic(%) |       |       |      | Weight(%) |       |       |       |
|------------------------------------|-----------|-------|-------|------|-----------|-------|-------|-------|
|                                    | Cu        | Ce    | O     | Ru   | Cu        | Ce    | O     | Ru    |
| CeO <sub>2</sub>                   | -         | 24.27 | 75.73 | -    | -         | 73.73 | 26.27 | -     |
| CeO <sub>2</sub> -Ru <sub>SA</sub> | -         | 21.02 | 75.64 | 3.34 | -         | 65.55 | 26.94 | 7.51  |
| CeO <sub>2</sub> @CuO              | 4.03      | 6.64  | 89.33 | -    | 9.79      | 35.57 | 54.64 | -     |
| EDHJ                               | 10.32     | 17.39 | 72.29 | -    | 15.43     | 57.35 | 27.22 | -     |
| Ru-O/EDHJ                          | 3.47      | 3.27  | 90.86 | 2.40 | 9.28      | 19.29 | 61.21 | 10.21 |
| Ru-Cu/EDHJ                         | 8.57      | 11.99 | 76.67 | 2.78 | 14.59     | 45.01 | 32.87 | 7.53  |

**Supplementary Table 2.** EXAFS fitting parameters at the Ru *K*-edge for various samples ( $S_0^2 = 0.96$ ). <sup>a</sup>*N*: coordination numbers; <sup>b</sup>*R*: bond distance; <sup>c</sup> $\sigma^2$ : Debye-Waller factors; <sup>d</sup> $\Delta E_0$ : the inner potential correction. *R* factor: goodness of fit.  $S_0^2$  was set to 0.96, according to the experimental EXAFS fit of Ru foil by fixing CN as the known crystallographic value.

| Sample     | Shell | <i>N</i> <sup>a</sup> | <i>R</i> (Å) <sup>b</sup> | $\sigma^2$ (Å <sup>2</sup> ) <sup>c</sup> | $\Delta E_0$ (eV) <sup>d</sup> | <i>R</i> factor |
|------------|-------|-----------------------|---------------------------|-------------------------------------------|--------------------------------|-----------------|
| Ru-Cu/EDHJ | Ru-O  | 1.98                  | 2.02                      | 0.0069                                    | 1.11                           | 0.0168          |
|            | Ru-Cu | 1.00                  | 2.44                      | 0.0079                                    |                                |                 |
|            | Ru-Cu | 1.00                  | 2.65                      | 0.0020                                    |                                |                 |
| Ru-O/EDHJ  | Ru-O  | 1.97                  | 1.97                      | 0.0017                                    | 0.12                           | 0.0061          |
|            | Ru-O  | 2.06                  | 2.06                      | 0.0031                                    |                                |                 |

**Supplementary Table 3.** Comparison of the kinetics based on Ru active sites on CeO<sub>2</sub>-Ru<sub>SA</sub>, Ru-O/EDHJ, and Ru-Cu/EDHJ.

| Biocatalysts                       | E <sub>0</sub> (μM) | <i>V</i> <sub>max</sub> (μM s <sup>-1</sup> ) | <i>K</i> <sub>m</sub> (mM) | TON (s <sup>-1</sup> ) | TON/ <i>K</i> <sub>m</sub> (s <sup>-1</sup> M <sup>-1</sup> ) |
|------------------------------------|---------------------|-----------------------------------------------|----------------------------|------------------------|---------------------------------------------------------------|
| Ru-Cu/EDHJ                         | 7.45                | 60.24                                         | 79.37                      | 8.09                   | 101.88                                                        |
| Ru-O/EDHJ                          | 10.11               | 21.56                                         | 294.72                     | 2.13                   | 7.24                                                          |
| CeO <sub>2</sub> -Ru <sub>SA</sub> | 7.43                | 14.60                                         | 212.84                     | 1.96                   | 9.23                                                          |
